# Supplementary material for: The potential, analysis and prospect of ctDNA sequencing in hepatocellular carcinoma
Source: PeerJ. 2022 May 17;10:e13473. doi: 10.7717/peerj.13473 (PMC9121877; doi:10.7717/peerj.13473)
Supplement: Supplemental Information 1 [file peerj-10-13473-s001.xlsx]

## Sheet: mutated genes and their frequen
Supplemental Table 1：All SNP and INDEL mutated genes and their frequency
GeneName	count	The total number of mutations	frequency
PDE4DIP	450	9007	0.0499611
SYNE1	214	9007	0.0237593
KMT2C	119	9007	0.0132119
PKHD1	110	9007	0.0122127
FN1	105	9007	0.0116576
LRP1B	98	9007	0.0108804
ALK	97	9007	0.0107694
FANCA	95	9007	0.0105474
NOTCH1	92	9007	0.0102143
ABCC4	79	9007	0.00877096
RNF213	79	9007	0.00877096
HNF1A	77	9007	0.00854891
LAMA2	76	9007	0.00843788
IGF2R	75	9007	0.00832686
NIN	75	9007	0.00832686
PIK3C2B	75	9007	0.00832686
APC	72	9007	0.00799378
DOCK8	72	9007	0.00799378
FGFR4	67	9007	0.00743866
RPS6KA2	65	9007	0.00721661
DST	63	9007	0.00699456
BRCA2	61	9007	0.00677251
RECQL4	61	9007	0.00677251
PMS2	60	9007	0.00666149
POLE	59	9007	0.00655046
NBPF20,PDE4DIP,NBPF9	57	9007	0.00632841
NOTCH4	57	9007	0.00632841
CSMD3	54	9007	0.00599534
LTF	53	9007	0.00588431
KMT2D	52	9007	0.00577329
ROS1	51	9007	0.00566226
WRN	51	9007	0.00566226
AKAP9	49	9007	0.00544021
POU5F1	49	9007	0.00544021
XRCC1	48	9007	0.00532919
ATR	47	9007	0.00521816
EGFR	47	9007	0.00521816
LPHN3	47	9007	0.00521816
MYH9	46	9007	0.00510714
RET	46	9007	0.00510714
BRCA1	44	9007	0.00488509
PARP1	44	9007	0.00488509
MAP3K1	43	9007	0.00477406
MYH11	43	9007	0.00477406
ABCB1	42	9007	0.00466304
PDGFRA	42	9007	0.00466304
UGT1A5	42	9007	0.00466304
CUX1	41	9007	0.00455202
IKBKE	41	9007	0.00455202
MTR	41	9007	0.00455202
NSD1	41	9007	0.00455202
BAI3	40	9007	0.00444099
BRIP1	40	9007	0.00444099
ERCC5,BIVM-ERCC5	40	9007	0.00444099
BCR	38	9007	0.00421894
EML4	38	9007	0.00421894
ITGB2	38	9007	0.00421894
NOTCH2	38	9007	0.00421894
DNMT1	37	9007	0.00410792
RALGDS	37	9007	0.00410792
CYP2D6	36	9007	0.00399689
EPHA7	36	9007	0.00399689
MTOR	36	9007	0.00399689
NLRP1	36	9007	0.00399689
TCF3	36	9007	0.00399689
XPC	36	9007	0.00399689
CASC5	35	9007	0.00388587
DDR1	35	9007	0.00388587
CARD11	34	9007	0.00377484
FLT3	34	9007	0.00377484
HSP90AA1	34	9007	0.00377484
INPP4B	34	9007	0.00377484
MET	34	9007	0.00377484
MTRR	34	9007	0.00377484
NBN	34	9007	0.00377484
SEPT9	34	9007	0.00377484
SYK	34	9007	0.00377484
CDH2	33	9007	0.00366382
IL7R	33	9007	0.00366382
PBRM1	33	9007	0.00366382
CBR3	32	9007	0.00355279
CUL4A	32	9007	0.00355279
EPHB4	31	9007	0.00344177
PTPRT	31	9007	0.00344177
SPRED1	31	9007	0.00344177
MED13	30	9007	0.00333074
PER1	30	9007	0.00333074
PIK3CG	30	9007	0.00333074
SETBP1	30	9007	0.00333074
ABCB11	29	9007	0.00321972
AXIN2	29	9007	0.00321972
CYP2A6	29	9007	0.00321972
EP400	29	9007	0.00321972
MMP2	29	9007	0.00321972
RRM1	29	9007	0.00321972
SLC22A1	29	9007	0.00321972
TSHR	29	9007	0.00321972
AFF3	28	9007	0.00310869
GPR124	28	9007	0.00310869
RNU6-71P	28	9007	0.00310869
AURKC	27	9007	0.00299767
ITGB3	27	9007	0.00299767
TYK2	27	9007	0.00299767
EP300	26	9007	0.00288664
ITGA9	26	9007	0.00288664
PTEN	26	9007	0.00288664
RXRG	26	9007	0.00288664
CCDC6	25	9007	0.00277562
CDH5	25	9007	0.00277562
DCC	25	9007	0.00277562
ERBB3	25	9007	0.00277562
ESR1	25	9007	0.00277562
PTCH1	25	9007	0.00277562
PTPRD	25	9007	0.00277562
MSH2	24	9007	0.00266459
RHBDF2	24	9007	0.00266459
SLC22A2	24	9007	0.00266459
TAS2R38	24	9007	0.00266459
TET2	24	9007	0.00266459
TNK2	24	9007	0.00266459
NCOA1	23	9007	0.00255357
PTPRK	23	9007	0.00255357
FBXO7	22	9007	0.00244254
IRS2	22	9007	0.00244254
SLCO1B1	22	9007	0.00244254
TET1	22	9007	0.00244254
TGFBR2	22	9007	0.00244254
UGT1A3	22	9007	0.00244254
ASXL1	21	9007	0.00233152
BRD3	21	9007	0.00233152
CANT1	21	9007	0.00233152
CASP8	21	9007	0.00233152
LAMP1	21	9007	0.00233152
MEN1	21	9007	0.00233152
MTHFR	21	9007	0.00233152
PIK3R2	21	9007	0.00233152
ACSL3	20	9007	0.0022205
CDH11	20	9007	0.0022205
COL1A1	20	9007	0.0022205
CRBN	20	9007	0.0022205
CSF1R	20	9007	0.0022205
DPYD	20	9007	0.0022205
IL2RB	20	9007	0.0022205
NF1	20	9007	0.0022205
NFKB2	20	9007	0.0022205
SETD2	20	9007	0.0022205
SRSF2	20	9007	0.0022205
AURKA	19	9007	0.00210947
BCOR	19	9007	0.00210947
CDH1	19	9007	0.00210947
CDH20	19	9007	0.00210947
NTRK3	19	9007	0.00210947
PML	19	9007	0.00210947
RNF43	19	9007	0.00210947
SDHA	19	9007	0.00210947
SF3B1	19	9007	0.00210947
SH2B3	19	9007	0.00210947
AURKB	18	9007	0.00199845
BLM	18	9007	0.00199845
DDR2	18	9007	0.00199845
FLT1	18	9007	0.00199845
NRG1	18	9007	0.00199845
PRKDC	18	9007	0.00199845
SLC34A2	18	9007	0.00199845
ABCC2	17	9007	0.00188742
ADAMTS20	17	9007	0.00188742
BCL2L2-PABPN1,BCL2L2	17	9007	0.00188742
IGF1R	17	9007	0.00188742
JAK1	17	9007	0.00188742
PAX7	17	9007	0.00188742
PIK3R1	17	9007	0.00188742
WT1	17	9007	0.00188742
AXL	16	9007	0.0017764
CREBBP	16	9007	0.0017764
ETV1	16	9007	0.0017764
FCGR3A	16	9007	0.0017764
JAK2	16	9007	0.0017764
NTRK1	16	9007	0.0017764
NUP214	16	9007	0.0017764
SLC25A13	16	9007	0.0017764
TRRAP	16	9007	0.0017764
ATM	15	9007	0.00166537
CMPK1	15	9007	0.00166537
CYP2C19	15	9007	0.00166537
DKC1	15	9007	0.00166537
EPHB1	15	9007	0.00166537
FGFR2	15	9007	0.00166537
ITGA10	15	9007	0.00166537
LPP	15	9007	0.00166537
MRE11A	15	9007	0.00166537
MST1R	15	9007	0.00166537
POLD1	15	9007	0.00166537
POT1	15	9007	0.00166537
TGM7	15	9007	0.00166537
TIMP3	15	9007	0.00166537
AXIN1	14	9007	0.00155435
FGFR3	14	9007	0.00155435
FLT4	14	9007	0.00155435
KEAP1	14	9007	0.00155435
KRAS	14	9007	0.00155435
MAGEA1	14	9007	0.00155435
TAF1L	14	9007	0.00155435
TERT	14	9007	0.00155435
THBS1	14	9007	0.00155435
ABL1	13	9007	0.00144332
BCL11A	13	9007	0.00144332
BCL6	13	9007	0.00144332
GATA2	13	9007	0.00144332
GUCY2F	13	9007	0.00144332
IKZF1	13	9007	0.00144332
MAML2	13	9007	0.00144332
MAP2K1	13	9007	0.00144332
MBD1	13	9007	0.00144332
PRF1	13	9007	0.00144332
RNASEL	13	9007	0.00144332
SAMD9	13	9007	0.00144332
BMPR1A	12	9007	0.0013323
CYP19A1	12	9007	0.0013323
ERCC4	12	9007	0.0013323
FAS	12	9007	0.0013323
FLCN	12	9007	0.0013323
FSTL5	12	9007	0.0013323
MYB	12	9007	0.0013323
PIK3CB	12	9007	0.0013323
STK36	12	9007	0.0013323
TAL1	12	9007	0.0013323
UMPS	12	9007	0.0013323
YES1	12	9007	0.0013323
ZNF384	12	9007	0.0013323
ARID1B	11	9007	0.00122127
BCL10	11	9007	0.00122127
BUB1B	11	9007	0.00122127
C8orf34	11	9007	0.00122127
CDKN2A	11	9007	0.00122127
CYP2B6	11	9007	0.00122127
ERBB2	11	9007	0.00122127
ERCC2	11	9007	0.00122127
ESR2	11	9007	0.00122127
EXT1	11	9007	0.00122127
FZR1	11	9007	0.00122127
GNAS	11	9007	0.00122127
KIF5B	11	9007	0.00122127
NFKB1	11	9007	0.00122127
PRSS1	11	9007	0.00122127
PSMB1	11	9007	0.00122127
PSMD1	11	9007	0.00122127
RXRB	11	9007	0.00122127
TP53	11	9007	0.00122127
TRIM33	11	9007	0.00122127
CCND1	10	9007	0.00111025
CHEK1	10	9007	0.00111025
DDB2	10	9007	0.00111025
DICER1	10	9007	0.00111025
EPHA3	10	9007	0.00111025
ERCC1	10	9007	0.00111025
ERG	10	9007	0.00111025
FAM46C	10	9007	0.00111025
FOXA1	10	9007	0.00111025
GJB2	10	9007	0.00111025
HSP90AB1	10	9007	0.00111025
KDR	10	9007	0.00111025
MAGI1	10	9007	0.00111025
MAP2K2	10	9007	0.00111025
MARK4	10	9007	0.00111025
MIR548AZ	10	9007	0.00111025
MYCL	10	9007	0.00111025
PAX3	10	9007	0.00111025
PAX5	10	9007	0.00111025
PBX1	10	9007	0.00111025
PGAP3	10	9007	0.00111025
PLCG1	10	9007	0.00111025
RSPO2	10	9007	0.00111025
SDHAF2	10	9007	0.00111025
SDHB	10	9007	0.00111025
SDHD	10	9007	0.00111025
SMO	10	9007	0.00111025
SOD2	10	9007	0.00111025
SRC	10	9007	0.00111025
TOE1	10	9007	0.00111025
TPR	10	9007	0.00111025
WHSC1	10	9007	0.00111025
ZNF276	10	9007	0.00111025
BIRC5	9	9007	0.000999223
CDKN2B-AS1	9	9007	0.000999223
DEK	9	9007	0.000999223
ETV4	9	9007	0.000999223
EXT2	9	9007	0.000999223
MTAP	9	9007	0.000999223
MUC1	9	9007	0.000999223
NCOA4	9	9007	0.000999223
PDGFRB	9	9007	0.000999223
RSPO3	9	9007	0.000999223
SMARCA4	9	9007	0.000999223
UGT1A8	9	9007	0.000999223
ACVR2A	8	9007	0.000888198
ARNT	8	9007	0.000888198
BLNK	8	9007	0.000888198
CHD7	8	9007	0.000888198
CSF3R	8	9007	0.000888198
DIS3L2	8	9007	0.000888198
DNMT3A	8	9007	0.000888198
ERBB4	8	9007	0.000888198
FANCF	8	9007	0.000888198
GSTP1	8	9007	0.000888198
HFE	8	9007	0.000888198
HIST1H3B	8	9007	0.000888198
KAT6A	8	9007	0.000888198
KDM6A	8	9007	0.000888198
LTK	8	9007	0.000888198
MSH6	8	9007	0.000888198
PPARG	8	9007	0.000888198
TCF12	8	9007	0.000888198
ZNF521	8	9007	0.000888198
AKT1	7	9007	0.000777173
BCL11B	7	9007	0.000777173
CD79B	7	9007	0.000777173
FANCD2	7	9007	0.000777173
GBGT1	7	9007	0.000777173
GNA11	7	9007	0.000777173
HRAS	7	9007	0.000777173
IRF4	7	9007	0.000777173
LIFR	7	9007	0.000777173
MDM4	7	9007	0.000777173
MN1	7	9007	0.000777173
NCOR1	7	9007	0.000777173
PIM1	7	9007	0.000777173
SSX1	7	9007	0.000777173
SUFU	7	9007	0.000777173
TPMT	7	9007	0.000777173
TRIP11	7	9007	0.000777173
ARID2	6	9007	0.000666149
ATF1	6	9007	0.000666149
BCL9	6	9007	0.000666149
CCND2	6	9007	0.000666149
CRTC1	6	9007	0.000666149
DAXX	6	9007	0.000666149
DDIT3	6	9007	0.000666149
ETS1	6	9007	0.000666149
FOXP4	6	9007	0.000666149
NELL2	6	9007	0.000666149
PLEKHG5	6	9007	0.000666149
PRDM1	6	9007	0.000666149
SDC4	6	9007	0.000666149
TNFRSF14	6	9007	0.000666149
XPA	6	9007	0.000666149
ATRX	5	9007	0.000555124
COL7A1	5	9007	0.000555124
EZH2	5	9007	0.000555124
GRM8	5	9007	0.000555124
GUCY1A2	5	9007	0.000555124
JAK3	5	9007	0.000555124
LRIG3	5	9007	0.000555124
MGC32805	5	9007	0.000555124
MUTYH	5	9007	0.000555124
NUMA1	5	9007	0.000555124
NUP98	5	9007	0.000555124
PALB2	5	9007	0.000555124
SERPINA1	5	9007	0.000555124
SMAD4	5	9007	0.000555124
STK11	5	9007	0.000555124
TCF7L2	5	9007	0.000555124
TGFBR1	5	9007	0.000555124
BCL2	4	9007	0.000444099
BIRC3	4	9007	0.000444099
BTK	4	9007	0.000444099
CIC	4	9007	0.000444099
ETV6	4	9007	0.000444099
FGFR1	4	9007	0.000444099
FLI1	4	9007	0.000444099
G6PD	4	9007	0.000444099
GNAQ	4	9007	0.000444099
IDH2	4	9007	0.000444099
KAT6B	4	9007	0.000444099
LOC100507346	4	9007	0.000444099
PHOX2B	4	9007	0.000444099
PIK3CD	4	9007	0.000444099
RB1	4	9007	0.000444099
SGK1	4	9007	0.000444099
ABL2	3	9007	0.000333074
ARID1A	3	9007	0.000333074
C2orf44	3	9007	0.000333074
CCNE1	3	9007	0.000333074
FANCC	3	9007	0.000333074
FOXP1	3	9007	0.000333074
HIF1A	3	9007	0.000333074
HMBS	3	9007	0.000333074
IL2	3	9007	0.000333074
IL2RA	3	9007	0.000333074
MAX	3	9007	0.000333074
MLLT10	3	9007	0.000333074
NCOA2	3	9007	0.000333074
PPP2R1A	3	9007	0.000333074
RAD21	3	9007	0.000333074
RAD51D	3	9007	0.000333074
SMARCB1	3	9007	0.000333074
TCF7L1	3	9007	0.000333074
TSC1	3	9007	0.000333074
UROD	3	9007	0.000333074
AMER1	2	9007	0.00022205
BAP1	2	9007	0.00022205
BRAF	2	9007	0.00022205
CBL	2	9007	0.00022205
CDA	2	9007	0.00022205
CEBPA	2	9007	0.00022205
CHEK2	2	9007	0.00022205
CTNNB1	2	9007	0.00022205
CYLD	2	9007	0.00022205
ETV5	2	9007	0.00022205
EWSR1	2	9007	0.00022205
EZR	2	9007	0.00022205
FAH	2	9007	0.00022205
FANCG	2	9007	0.00022205
FOXO1	2	9007	0.00022205
IPO11	2	9007	0.00022205
JUN	2	9007	0.00022205
KIT	2	9007	0.00022205
KMT2A	2	9007	0.00022205
MAPK8	2	9007	0.00022205
MLH1	2	9007	0.00022205
PSMB2	2	9007	0.00022205
PSMD2	2	9007	0.00022205
PTGS2	2	9007	0.00022205
RAD50	2	9007	0.00022205
RARG	2	9007	0.00022205
RXRA	2	9007	0.00022205
SOX9	2	9007	0.00022205
TCL1A	2	9007	0.00022205
TOE1,MUTYH	2	9007	0.00022205
TSC2	2	9007	0.00022205
UGT1A1	2	9007	0.00022205
USP9X	2	9007	0.00022205
WTAP	2	9007	0.00022205
ZMYM3	2	9007	0.00022205
AFF1	1	9007	0.000111025
AKT2	1	9007	0.000111025
BCL3	1	9007	0.000111025
BCYRN1	1	9007	0.000111025
BIRC2	1	9007	0.000111025
CDK12	1	9007	0.000111025
CDKN1B	1	9007	0.000111025
CDKN2C	1	9007	0.000111025
CRLF2	1	9007	0.000111025
EIF3E	1	9007	0.000111025
EPHB6	1	9007	0.000111025
FH	1	9007	0.000111025
FOXO3	1	9007	0.000111025
FUBP1	1	9007	0.000111025
GATA3	1	9007	0.000111025
H3F3A	1	9007	0.000111025
IDH1	1	9007	0.000111025
IKBKB	1	9007	0.000111025
IL21R	1	9007	0.000111025
ING4	1	9007	0.000111025
LCK	1	9007	0.000111025
MAP3K7	1	9007	0.000111025
MED12	1	9007	0.000111025
MITF	1	9007	0.000111025
MPL	1	9007	0.000111025
MYC	1	9007	0.000111025
PDGFB	1	9007	0.000111025
PIK3CA	1	9007	0.000111025
PLAG1	1	9007	0.000111025
PMS1	1	9007	0.000111025
PRKAR1A	1	9007	0.000111025
PSIP1	1	9007	0.000111025
PTPN11	1	9007	0.000111025
RAF1	1	9007	0.000111025
RARB	1	9007	0.000111025
RPS6KB1	1	9007	0.000111025
RUNX1	1	9007	0.000111025
RUNX1T1	1	9007	0.000111025
SBDS	1	9007	0.000111025
SHH	1	9007	0.000111025
SLC45A3	1	9007	0.000111025
SMARCD1	1	9007	0.000111025
STAG2	1	9007	0.000111025
STAT3	1	9007	0.000111025
TLR4	1	9007	0.000111025
TMEM127	1	9007	0.000111025
TRIM24	1	9007	0.000111025
U2AF1	1	9007	0.000111025
UBR5	1	9007	0.000111025
VHL	1	9007	0.000111025
XPO1	1	9007	0.000111025

## Sheet: Sheet1
						GeneName
						TNFRSF14
						MTOR
						MTOR
						MTOR
						MTHFR
						MTHFR
						SDHB
						PAX7
						PAX7
						PAX7
						CDA
						ARID1A
						ARID1A
						CSF3R
						MYCL
						TOE1
						TAL1
						CMPK1
						JAK1
						JAK1
						DPYD
						DPYD
						TRIM33
						FAM46C
						FAM46C
						FAM46C
						FAM46C
						NOTCH2
						NOTCH2
						NOTCH2
						PDE4DIP
						PDE4DIP
						PDE4DIP
						PDE4DIP
						PDE4DIP
						PDE4DIP
						PDE4DIP
						PDE4DIP
						PDE4DIP
						PDE4DIP
						PDE4DIP
						PDE4DIP
						PDE4DIP
						PDE4DIP
						PDE4DIP
						PDE4DIP
						PDE4DIP
						NBPF20,PDE4DIP,NBPF9
						PDE4DIP
						NBPF20,PDE4DIP,NBPF9
						PDE4DIP
						PDE4DIP
						PDE4DIP
						PDE4DIP
						PDE4DIP
						PDE4DIP
						PDE4DIP
						PDE4DIP
						PDE4DIP
						NBPF20,PDE4DIP,NBPF9
						PDE4DIP
						PDE4DIP
						PDE4DIP
						PDE4DIP
						PDE4DIP
						PDE4DIP
						PDE4DIP
						PDE4DIP
						PDE4DIP
						PDE4DIP
						PDE4DIP
						PDE4DIP
						PDE4DIP
						PDE4DIP
						PDE4DIP
						PDE4DIP
						NBPF20,PDE4DIP,NBPF9
						NBPF20,PDE4DIP,NBPF9
						PDE4DIP
						PDE4DIP
						ITGA10
						ARNT
						MUC1
						NTRK1
						NTRK1
						NTRK1
						FCGR3A
						DDR2
						DDR2
						PBX1
						PBX1
						RXRG
						RXRG
						RNASEL
						RNASEL
						TPR
						TPR
						PTGS2
						PIK3C2B
						PIK3C2B
						PIK3C2B
						PIK3C2B
						PIK3C2B
						PIK3C2B
						PIK3C2B
						PIK3C2B
						PIK3C2B
						PIK3C2B
						IKBKE
						IKBKE
						IKBKE
						IKBKE
						IKBKE
						PARP1
						PARP1
						PARP1
						PARP1
						PARP1
						MTR
						MTR
						MTR
						NCOA1
						NCOA1
						DNMT3A
						DNMT3A
						ALK
						ALK
						ALK
						ALK
						ALK
						ALK
						ALK
						ALK
						ALK
						EML4
						EML4
						EML4
						EML4
						MSH2
						MSH6
						BCL11A
						XPO1
						AFF3
						AFF3
						LRP1B
						LRP1B
						LRP1B
						LRP1B
						LRP1B
						LRP1B
						LRP1B
						LRP1B
						LRP1B
						LRP1B
						ACVR2A
						ABCB11
						ABCB11
						ABCB11
						ABCB11
						PMS1
						CASP8
						CASP8
						ERBB4
						FN1
						FN1
						FN1
						FN1
						FN1
						FN1
						FN1
						FN1
						FN1
						FN1
						PAX3
						ACSL3
						ACSL3
						PSMD1
						DIS3L2
						UGT1A8
						UGT1A5
						UGT1A5
						UGT1A5
						UGT1A5
						UGT1A5
						UGT1A5
						UGT1A5
						UGT1A5
						UGT1A3
						UGT1A3
						UGT1A3
						CRBN
						CRBN
						PPARG
						XPC
						XPC
						XPC
						XPC
						TGFBR2
						TGFBR2
						ITGA9
						ITGA9
						ITGA9
						LTF
						LTF
						LTF
						LTF
						LTF
						LTF
						LTF
						LTF
						SETD2
						SETD2
						SETD2
						MST1R
						PBRM1
						PBRM1
						PBRM1
						PBRM1
						MAGI1
						FOXP1
						EPHA3
						EPHA3
						UMPS
						UMPS
						GATA2
						PIK3CB
						ATR
						ATR
						ATR
						ATR
						ATR
						BCL6
						TNK2
						TNK2
						FGFR3
						WHSC1
						SLC34A2
						SLC34A2
						PDGFRA
						PDGFRA
						PDGFRA
						PDGFRA
						LPHN3
						LPHN3
						LPHN3
						LPHN3
						LPHN3
						NFKB1
						NFKB1
						TET2
						IL2
						INPP4B
						INPP4B
						INPP4B
						INPP4B
						FSTL5
						FSTL5
						TERT
						MTRR
						MTRR
						MTRR
						MTRR
						IL7R
						IL7R
						IL7R
						IL7R
						LIFR
						MAP3K1
						MAP3K1
						MAP3K1
						MAP3K1
						MAP3K1
						MAP3K1
						MAP3K1
						PIK3R1
						PIK3R1
						APC
						APC
						APC
						APC
						APC
						APC
						APC
						CSF1R
						FGFR4
						FGFR4
						FGFR4
						FGFR4
						FGFR4
						FGFR4
						FGFR4
						NSD1
						FLT4
						FLT4
						TPMT
						HIST1H3B
						HFE
						DDR1
						DDR1
						DDR1
						POU5F1
						POU5F1
						POU5F1
						POU5F1
						NOTCH4
						NOTCH4
						NOTCH4
						NOTCH4
						RXRB
						DAXX
						FOXP4
						HSP90AB1
						PKHD1
						PKHD1
						PKHD1
						PKHD1
						PKHD1
						PKHD1
						PKHD1
						PKHD1
						PKHD1
						PKHD1
						PKHD1
						PKHD1
						DST
						DST
						DST
						BAI3
						BAI3
						BAI3
						EPHA7
						EPHA7
						EPHA7
						PRDM1
						ROS1
						ROS1
						ROS1
						ROS1
						ROS1
						ROS1
						RSPO3
						PTPRK
						PTPRK
						PTPRK
						LAMA2
						LAMA2
						LAMA2
						LAMA2
						LAMA2
						LAMA2
						LAMA2
						LAMA2
						LAMA2
						LAMA2
						SGK1
						ESR1
						ESR1
						SYNE1
						SYNE1
						SYNE1
						SYNE1
						SYNE1
						SYNE1
						SYNE1
						SYNE1
						SYNE1
						SYNE1
						SYNE1
						SYNE1
						SYNE1
						SYNE1
						SYNE1
						SYNE1
						SYNE1
						SYNE1
						SYNE1
						SYNE1
						SYNE1
						SYNE1
						ARID1B
						IGF2R
						IGF2R
						IGF2R
						IGF2R
						IGF2R
						IGF2R
						IGF2R
						IGF2R
						IGF2R
						SLC22A1
						SLC22A1
						SLC22A1
						SLC22A2
						SLC22A2
						SLC22A2
						RPS6KA2
						RPS6KA2
						RPS6KA2
						RPS6KA2
						RPS6KA2
						RPS6KA2
						RPS6KA2
						RPS6KA2
						PSMB1
						CARD11
						CARD11
						CARD11
						CARD11
						CARD11
						CARD11
						CARD11
						PMS2
						PMS2
						PMS2
						PMS2
						PMS2
						PMS2
						PMS2
						PMS2
						ETV1
						IKZF1
						IKZF1
						EGFR
						EGFR
						EGFR
						EGFR
						EGFR
						ABCB1
						ABCB1
						ABCB1
						AKAP9
						AKAP9
						AKAP9
						AKAP9
						AKAP9
						AKAP9
						AKAP9
						AKAP9
						AKAP9
						AKAP9
						AKAP9
						SAMD9
						SAMD9
						SLC25A13
						TRRAP
						EPHB4
						EPHB4
						EPHB4
						CUX1
						CUX1
						CUX1
						CUX1
						PIK3CG
						PIK3CG
						PIK3CG
						MET
						MET
						GRM8
						SMO
						TAS2R38
						TAS2R38
						TAS2R38
						EPHB6
						EZH2
						KMT2C
						KMT2C
						KMT2C
						KMT2C
						KMT2C
						KMT2C
						KMT2C
						KMT2C
						KMT2C
						KMT2C
						KMT2C
						KMT2C
						KMT2C
						WRN
						WRN
						WRN
						WRN
						WRN
						WRN
						NRG1
						GPR124
						GPR124
						GPR124
						FGFR1
						KAT6A
						PRKDC
						CHD7
						C8orf34
						C8orf34
						RSPO2
						CSMD3
						CSMD3
						CSMD3
						CSMD3
						CSMD3
						CSMD3
						EXT1
						EXT1
						EXT1
						MYC
						RECQL4
						RECQL4
						RECQL4
						RECQL4
						RECQL4
						RECQL4
						RECQL4
						DOCK8
						DOCK8
						DOCK8
						DOCK8
						DOCK8
						DOCK8
						DOCK8
						JAK2
						JAK2
						PTPRD
						MTAP
						MTAP
						CDKN2A
						CDKN2B-AS1
						TAF1L
						TAF1L
						PAX5
						GNAQ
						SYK
						SYK
						SYK
						SYK
						SYK
						SYK
						PTCH1
						PTCH1
						XPA
						ABL1
						NUP214
						NUP214
						RALGDS
						RALGDS
						RALGDS
						RALGDS
						GBGT1
						BRD3
						BRD3
						BRD3
						NOTCH1
						NOTCH1
						NOTCH1
						NOTCH1
						NOTCH1
						NOTCH1
						NOTCH1
						NOTCH1
						NOTCH1
						KIF5B
						RET
						RET
						CCDC6
						TET1
						TET1
						PRF1
						PRF1
						BMPR1A
						PTEN
						PTEN
						FAS
						CYP2C19
						CYP2C19
						BLNK
						ABCC2
						ABCC2
						NFKB2
						NFKB2
						SUFU
						FGFR2
						HRAS
						RRM1
						RRM1
						RRM1
						RRM1
						EXT2
						EXT2
						DDB2
						SDHAF2
						MEN1
						GSTP1
						GSTP1
						CCND1
						NUMA1
						NUMA1
						MRE11A
						MRE11A
						MAML2
						MAML2
						BIRC3
						ATM
						SDHD
						HMBS
						CHEK1
						ETS1
						ZNF384
						ETV6
						SLCO1B1
						KRAS
						ADAMTS20
						NELL2
						ARID2
						KMT2D
						KMT2D
						KMT2D
						KMT2D
						KMT2D
						KMT2D
						ERBB3
						DDIT3
						SH2B3
						HNF1A
						HNF1A
						HNF1A
						HNF1A
						HNF1A
						HNF1A
						HNF1A
						HNF1A
						EP400
						EP400
						EP400
						POLE
						POLE
						POLE
						POLE
						POLE
						POLE
						FLT3
						FLT3
						FLT3
						FLT3
						FLT1
						BRCA2
						BRCA2
						BRCA2
						BRCA2
						BRCA2
						BRCA2
						FOXO1
						ABCC4
						ABCC4
						ABCC4
						ABCC4
						ABCC4
						ABCC4
						ABCC4
						ABCC4
						ABCC4
						ERCC5,BIVM-ERCC5
						ERCC5,BIVM-ERCC5
						ERCC5,BIVM-ERCC5
						ERCC5,BIVM-ERCC5
						ERCC5,BIVM-ERCC5
						IRS2
						CUL4A
						LAMP1
						BCL2L2-PABPN1,BCL2L2
						FOXA1
						NIN
						NIN
						NIN
						NIN
						NIN
						NIN
						NIN
						NIN
						NIN
						MIR548AZ
						TSHR
						TSHR
						TSHR
						TSHR
						TRIP11
						SERPINA1
						SERPINA1
						DICER1
						HSP90AA1
						HSP90AA1
						HSP90AA1
						AKT1
						SPRED1
						SPRED1
						SPRED1
						THBS1
						THBS1
						THBS1
						BUB1B
						BUB1B
						CASC5
						CASC5
						CASC5
						CASC5
						CASC5
						CASC5
						CASC5
						CASC5
						CASC5
						CASC5
						LTK
						TGM7
						TGM7
						CYP19A1
						TCF12
						MAP2K1
						PML
						PML
						NTRK3
						NTRK3
						NTRK3
						NTRK3
						BLM
						BLM
						AXIN1
						CREBBP
						CREBBP
						CREBBP
						CREBBP
						ERCC4
						MYH11
						MYH11
						MYH11
						MYH11
						CYLD
						MMP2
						MMP2
						MMP2
						CDH11
						CDH5
						CDH5
						CDH1
						CDH1
						CDH1
						ZNF276
						FANCA
						FANCA
						FANCA
						FANCA
						FANCA
						FANCA
						NLRP1
						NLRP1
						NLRP1
						NLRP1
						NLRP1
						NLRP1
						TP53
						PER1
						PER1
						AURKB
						AURKB
						FLCN
						NF1
						PGAP3
						PGAP3
						ERBB2
						ERBB2
						BRCA1
						BRCA1
						BRCA1
						BRCA1
						BRCA1
						BRCA1
						BRCA1
						ETV4
						ITGB3
						ITGB3
						ITGB3
						ITGB3
						COL1A1
						COL1A1
						RNF43
						RNF43
						RNF43
						BRIP1
						BRIP1
						BRIP1
						BRIP1
						MED13
						MED13
						MED13
						CD79B
						AXIN2
						AXIN2
						AXIN2
						RHBDF2
						RHBDF2
						SRSF2
						SRSF2
						SEPT9
						SEPT9
						SEPT9
						SEPT9
						BIRC5
						CANT1
						CANT1
						RNF213
						RNF213
						RNF213
						RNF213
						RNF213
						RNF213
						RNF213
						RNF213
						RNF213
						RNF213
						RNF213
						YES1
						CDH2
						CDH2
						CDH2
						SETBP1
						SETBP1
						MBD1
						DCC
						DCC
						CDH20
						CDH20
						TCF3
						TCF3
						TCF3
						TCF3
						TCF3
						TCF3
						FZR1
						FZR1
						MAP2K2
						DNMT1
						TYK2
						TYK2
						TYK2
						SMARCA4
						PIK3R2
						PIK3R2
						CRTC1
						CCNE1
						CYP2A6
						CYP2A6
						AXL
						AXL
						XRCC1
						XRCC1
						XRCC1
						XRCC1
						MARK4
						ERCC2
						POLD1
						POLD1
						POLD1
						PPP2R1A
						AURKC
						AURKC
						AURKC
						ASXL1
						ASXL1
						SRC
						PLCG1
						PTPRT
						PTPRT
						PTPRT
						PTPRT
						SDC4
						AURKA
						AURKA
						GNAS
						GNAS
						GNAS
						RUNX1
						CBR3
						CBR3
						CBR3
						ERG
						ITGB2
						ITGB2
						ITGB2
						ITGB2
						ITGB2
						BCR
						BCR
						BCR
						BCR
						FBXO7
						FBXO7
						FBXO7
						TIMP3
						MYH9
						MYH9
						MYH9
						MYH9
						MYH9
						IL2RB
						IL2RB
						IL2RB
						EP300
						EP300
						CYP2D6
						CYP2D6
						CYP2D6
						CYP2D6
						BCOR
						BCOR
						KDM6A
						AMER1
						ATRX
						GUCY2F
						MAGEA1
						MAGEA1
						DKC1
						TNFRSF14
						PLEKHG5
						MTOR
						MTOR
						MTOR
						MTHFR
						MTHFR
						MTHFR
						SDHB
						PAX7
						PAX7
						PAX7
						CSF3R
						MYCL
						TOE1
						TAL1
						CMPK1
						JAK1
						JAK1
						FUBP1
						BCL10
						DPYD
						DPYD
						TRIM33
						NOTCH2
						NOTCH2
						NOTCH2
						NOTCH2
						PDE4DIP
						PDE4DIP
						PDE4DIP
						PDE4DIP
						PDE4DIP
						PDE4DIP
						PDE4DIP
						PDE4DIP
						PDE4DIP
						PDE4DIP
						PDE4DIP
						PDE4DIP
						PDE4DIP
						PDE4DIP
						NBPF20,PDE4DIP,NBPF9
						PDE4DIP
						NBPF20,PDE4DIP,NBPF9
						PDE4DIP
						PDE4DIP
						PDE4DIP
						PDE4DIP
						PDE4DIP
						PDE4DIP
						PDE4DIP
						PDE4DIP
						PDE4DIP
						PDE4DIP
						NBPF20,PDE4DIP,NBPF9
						PDE4DIP
						PDE4DIP
						PDE4DIP
						PDE4DIP
						PDE4DIP
						PDE4DIP
						PDE4DIP
						PDE4DIP
						PDE4DIP
						PDE4DIP
						PDE4DIP
						PDE4DIP
						PDE4DIP
						PDE4DIP
						PDE4DIP
						PDE4DIP
						PDE4DIP
						PDE4DIP
						PDE4DIP
						NBPF20,PDE4DIP,NBPF9
						NBPF20,PDE4DIP,NBPF9
						NBPF20,PDE4DIP,NBPF9
						PDE4DIP
						PDE4DIP
						ITGA10
						ITGA10
						ARNT
						NTRK1
						NTRK1
						FCGR3A
						FCGR3A
						FCGR3A
						DDR2
						PBX1
						RXRG
						RXRG
						RXRG
						RNASEL
						PIK3C2B
						PIK3C2B
						PIK3C2B
						PIK3C2B
						PIK3C2B
						PIK3C2B
						PIK3C2B
						MDM4
						IKBKE
						IKBKE
						IKBKE
						IKBKE
						IKBKE
						PARP1
						PARP1
						PARP1
						PARP1
						MTR
						MTR
						MTR
						MTR
						MTR
						NCOA1
						NCOA1
						DNMT3A
						ALK
						ALK
						ALK
						ALK
						ALK
						ALK
						ALK
						ALK
						ALK
						ALK
						ALK
						EML4
						EML4
						EML4
						MSH2
						MSH2
						MSH6
						MSH6
						BCL11A
						AFF3
						LRP1B
						LRP1B
						LRP1B
						LRP1B
						LRP1B
						LRP1B
						LRP1B
						LRP1B
						LRP1B
						LRP1B
						ABCB11
						ABCB11
						ABCB11
						CASP8
						CASP8
						ERBB4
						FN1
						FN1
						FN1
						FN1
						FN1
						FN1
						FN1
						FN1
						FN1
						FN1
						FN1
						STK36
						PAX3
						ACSL3
						ACSL3
						PSMD1
						UGT1A8
						UGT1A5
						UGT1A5
						UGT1A5
						UGT1A5
						UGT1A5
						UGT1A5
						UGT1A5
						UGT1A5
						UGT1A5
						UGT1A3
						UGT1A3
						UGT1A3
						UGT1A1
						CRBN
						CRBN
						PPARG
						XPC
						XPC
						XPC
						XPC
						XPC
						TGFBR2
						TGFBR2
						TGFBR2
						MLH1
						ITGA9
						ITGA9
						ITGA9
						ITGA9
						LTF
						LTF
						LTF
						LTF
						LTF
						LTF
						LTF
						LTF
						SETD2
						SETD2
						COL7A1
						MST1R
						PBRM1
						PBRM1
						PBRM1
						PBRM1
						MAGI1
						MITF
						UMPS
						UMPS
						GATA2
						GATA2
						EPHB1
						PIK3CB
						ATR
						ATR
						ATR
						ATR
						ATR
						BCL6
						BCL6
						LPP
						LPP
						TNK2
						TNK2
						TNK2
						TNK2
						FGFR3
						WHSC1
						SLC34A2
						SLC34A2
						PDGFRA
						PDGFRA
						PDGFRA
						PDGFRA
						PDGFRA
						PDGFRA
						KDR
						LPHN3
						LPHN3
						LPHN3
						LPHN3
						LPHN3
						NFKB1
						TET2
						INPP4B
						INPP4B
						INPP4B
						FSTL5
						SDHA
						TERT
						MTRR
						MTRR
						MTRR
						MTRR
						IL7R
						LIFR
						MAP3K1
						MAP3K1
						MAP3K1
						MAP3K1
						IPO11
						IPO11
						PIK3R1
						PIK3R1
						APC
						APC
						APC
						APC
						APC
						APC
						APC
						MGC32805
						MGC32805
						CSF1R
						CSF1R
						CSF1R
						FGFR4
						FGFR4
						FGFR4
						FGFR4
						FGFR4
						FGFR4
						NSD1
						NSD1
						NSD1
						NSD1
						HIST1H3B
						HFE
						DDR1
						DDR1
						DDR1
						DDR1
						POU5F1
						POU5F1
						POU5F1
						POU5F1
						POU5F1
						NOTCH4
						NOTCH4
						NOTCH4
						NOTCH4
						NOTCH4
						RXRB
						DAXX
						HSP90AB1
						PKHD1
						PKHD1
						PKHD1
						PKHD1
						PKHD1
						PKHD1
						PKHD1
						PKHD1
						PKHD1
						PKHD1
						DST
						DST
						DST
						DST
						RNU6-71P
						DST
						DST
						BAI3
						BAI3
						BAI3
						BAI3
						EPHA7
						EPHA7
						EPHA7
						EPHA7
						EPHA7
						PRDM1
						FOXO3
						ROS1
						ROS1
						ROS1
						ROS1
						RSPO3
						RSPO3
						PTPRK
						PTPRK
						PTPRK
						LAMA2
						LAMA2
						LAMA2
						LAMA2
						LAMA2
						LAMA2
						LAMA2
						MYB
						MYB
						ESR1
						ESR1
						ESR1
						SYNE1
						SYNE1
						SYNE1
						SYNE1
						SYNE1
						SYNE1
						SYNE1
						SYNE1
						SYNE1
						SYNE1
						SYNE1
						SYNE1
						SYNE1
						SYNE1
						SYNE1
						SYNE1
						SYNE1
						SYNE1
						SYNE1
						ARID1B
						SOD2
						IGF2R
						IGF2R
						IGF2R
						IGF2R
						IGF2R
						IGF2R
						IGF2R
						IGF2R
						SLC22A1
						SLC22A1
						SLC22A1
						SLC22A2
						SLC22A2
						SLC22A2
						RPS6KA2
						RPS6KA2
						RPS6KA2
						RPS6KA2
						RPS6KA2
						RPS6KA2
						PSMB1
						CARD11
						CARD11
						CARD11
						PMS2
						PMS2
						PMS2
						PMS2
						PMS2
						PMS2
						ETV1
						ETV1
						IKZF1
						EGFR
						EGFR
						EGFR
						EGFR
						EGFR
						EGFR
						ABCB1
						ABCB1
						ABCB1
						ABCB1
						AKAP9
						AKAP9
						AKAP9
						SAMD9
						SAMD9
						SAMD9
						SLC25A13
						SLC25A13
						TRRAP
						EPHB4
						EPHB4
						EPHB4
						EPHB4
						CUX1
						CUX1
						CUX1
						CUX1
						PIK3CG
						PIK3CG
						PIK3CG
						MET
						MET
						MET
						MET
						POT1
						POT1
						SMO
						TAS2R38
						TAS2R38
						TAS2R38
						PRSS1
						KMT2C
						KMT2C
						KMT2C
						KMT2C
						KMT2C
						KMT2C
						KMT2C
						KMT2C
						KMT2C
						KMT2C
						KMT2C
						KMT2C
						KMT2C
						KMT2C
						KMT2C
						KMT2C
						WRN
						WRN
						WRN
						WRN
						WRN
						WRN
						NRG1
						NRG1
						NRG1
						GPR124
						GPR124
						GPR124
						GPR124
						KAT6A
						PRKDC
						PRKDC
						PRKDC
						PRKDC
						CHD7
						C8orf34
						C8orf34
						NBN
						NBN
						NBN
						NBN
						NBN
						RSPO2
						RSPO2
						CSMD3
						CSMD3
						CSMD3
						CSMD3
						CSMD3
						CSMD3
						RAD21
						RECQL4
						RECQL4
						RECQL4
						RECQL4
						RECQL4
						RECQL4
						RECQL4
						DOCK8
						DOCK8
						DOCK8
						DOCK8
						DOCK8
						DOCK8
						JAK2
						JAK2
						PTPRD
						PTPRD
						PTPRD
						MTAP
						CDKN2A
						CDKN2A
						CDKN2B-AS1
						TAF1L
						TAF1L
						TAF1L
						FANCG
						PAX5
						GNAQ
						SYK
						PTCH1
						XPA
						ABL1
						NUP214
						NUP214
						RALGDS
						RALGDS
						RALGDS
						RALGDS
						RALGDS
						GBGT1
						BRD3
						BRD3
						NOTCH1
						NOTCH1
						NOTCH1
						NOTCH1
						NOTCH1
						NOTCH1
						NOTCH1
						NOTCH1
						NOTCH1
						KIF5B
						RET
						RET
						RET
						RET
						RET
						RET
						MAPK8
						NCOA4
						CCDC6
						TET1
						PRF1
						PRF1
						KAT6B
						KAT6B
						BMPR1A
						PTEN
						FAS
						FAS
						FAS
						CYP2C19
						CYP2C19
						BLNK
						BLNK
						ABCC2
						ABCC2
						NFKB2
						NFKB2
						NFKB2
						SUFU
						TCF7L2
						FGFR2
						FGFR2
						HRAS
						NUP98
						RRM1
						RRM1
						RRM1
						FANCF
						WT1
						WT1
						EXT2
						DDB2
						SDHAF2
						MEN1
						MEN1
						GSTP1
						GSTP1
						CCND1
						NUMA1
						MAML2
						GUCY1A2
						ATM
						SDHD
						CBL
						CHEK1
						FLI1
						ZNF384
						SLCO1B1
						SLCO1B1
						SLCO1B1
						KRAS
						ADAMTS20
						ARID2
						ARID2
						KMT2D
						KMT2D
						KMT2D
						KMT2D
						KMT2D
						RARG
						ERBB3
						ERBB3
						ERBB3
						DDIT3
						SH2B3
						HNF1A
						HNF1A
						HNF1A
						HNF1A
						HNF1A
						HNF1A
						HNF1A
						EP400
						EP400
						POLE
						POLE
						POLE
						POLE
						FLT3
						FLT3
						FLT3
						FLT1
						FLT1
						BRCA2
						BRCA2
						BRCA2
						BRCA2
						BRCA2
						BRCA2
						BRCA2
						BRCA2
						ABCC4
						ABCC4
						ABCC4
						ABCC4
						ABCC4
						ABCC4
						ABCC4
						ABCC4
						ABCC4
						ERCC5,BIVM-ERCC5
						ERCC5,BIVM-ERCC5
						ERCC5,BIVM-ERCC5
						ERCC5,BIVM-ERCC5
						IRS2
						IRS2
						IRS2
						CUL4A
						CUL4A
						CUL4A
						CUL4A
						LAMP1
						LAMP1
						LAMP1
						LAMP1
						BCL2L2-PABPN1,BCL2L2
						BCL2L2-PABPN1,BCL2L2
						FOXA1
						NIN
						NIN
						NIN
						NIN
						NIN
						NIN
						NIN
						NIN
						NIN
						MIR548AZ
						ESR2
						TSHR
						TSHR
						TSHR
						TRIP11
						DICER1
						BCL11B
						HSP90AA1
						HSP90AA1
						HSP90AA1
						AKT1
						SPRED1
						SPRED1
						SPRED1
						THBS1
						THBS1
						THBS1
						CASC5
						CASC5
						CASC5
						CASC5
						CASC5
						CASC5
						CASC5
						LTK
						CYP19A1
						TCF12
						MAP2K1
						PML
						PML
						PML
						NTRK3
						IGF1R
						IGF1R
						AXIN1
						TSC2
						CREBBP
						CREBBP
						CREBBP
						CREBBP
						ERCC4
						MYH11
						MYH11
						MYH11
						MYH11
						MYH11
						MYH11
						PALB2
						MMP2
						CDH11
						CDH11
						CDH5
						CDH5
						CDH5
						CDH1
						CDH1
						ZNF276
						FANCA
						FANCA
						FANCA
						FANCA
						FANCA
						FANCA
						FANCA
						FANCA
						FANCA
						FANCA
						FANCA
						FANCA
						FANCA
						FANCA
						FANCA
						FANCA
						FANCA
						FANCA
						FANCA
						NLRP1
						TP53
						PER1
						PER1
						PER1
						PER1
						AURKB
						AURKB
						NCOR1
						FLCN
						NF1
						NF1
						NF1
						PGAP3
						PGAP3
						ERBB2
						ERBB2
						BRCA1
						BRCA1
						BRCA1
						BRCA1
						BRCA1
						BRCA1
						BRCA1
						ITGB3
						ITGB3
						ITGB3
						COL1A1
						COL1A1
						BRIP1
						BRIP1
						BRIP1
						BRIP1
						MED13
						MED13
						MED13
						CD79B
						AXIN2
						AXIN2
						AXIN2
						RHBDF2
						RHBDF2
						SRSF2
						SRSF2
						SEPT9
						SEPT9
						BIRC5
						CANT1
						CANT1
						RNF213
						RNF213
						RNF213
						RNF213
						RNF213
						RNF213
						RNF213
						RNF213
						YES1
						CDH2
						CDH2
						CDH2
						SETBP1
						SETBP1
						SETBP1
						SETBP1
						MBD1
						DCC
						DCC
						CDH20
						STK11
						TCF3
						TCF3
						TCF3
						FZR1
						MAP2K2
						DNMT1
						DNMT1
						DNMT1
						TYK2
						TYK2
						TYK2
						KEAP1
						KEAP1
						PIK3R2
						PIK3R2
						CRTC1
						CCNE1
						CYP2A6
						CYP2B6
						AXL
						CIC
						XRCC1
						XRCC1
						XRCC1
						XRCC1
						XRCC1
						MARK4
						ERCC1
						AURKC
						AURKC
						ASXL1
						ASXL1
						SRC
						PLCG1
						PTPRT
						SDC4
						AURKA
						AURKA
						GNAS
						CBR3
						CBR3
						CBR3
						CBR3
						ERG
						ITGB2
						ITGB2
						ITGB2
						ITGB2
						BCR
						BCR
						BCR
						BCR
						BCR
						BCR
						BCR
						CHEK2
						EWSR1
						FBXO7
						FBXO7
						FBXO7
						TIMP3
						TIMP3
						MYH9
						MYH9
						MYH9
						MYH9
						IL2RB
						IL2RB
						IL2RB
						EP300
						EP300
						EP300
						CYP2D6
						CYP2D6
						CYP2D6
						BCOR
						BCOR
						KDM6A
						KDM6A
						SSX1
						ATRX
						GUCY2F
						MAGEA1
						MAGEA1
						DKC1
						TNFRSF14
						PLEKHG5
						PLEKHG5
						PIK3CD
						MTOR
						MTOR
						MTOR
						MTHFR
						SDHB
						PAX7
						PAX7
						PAX7
						CSF3R
						MYCL
						TOE1
						TOE1,MUTYH
						TAL1
						CMPK1
						JUN
						BCL10
						DPYD
						DPYD
						TRIM33
						TRIM33
						FAM46C
						NOTCH2
						NOTCH2
						NOTCH2
						PDE4DIP
						PDE4DIP
						PDE4DIP
						PDE4DIP
						PDE4DIP
						PDE4DIP
						PDE4DIP
						PDE4DIP
						PDE4DIP
						PDE4DIP
						PDE4DIP
						PDE4DIP
						PDE4DIP
						PDE4DIP
						PDE4DIP
						PDE4DIP
						PDE4DIP
						PDE4DIP
						PDE4DIP
						NBPF20,PDE4DIP,NBPF9
						PDE4DIP
						NBPF20,PDE4DIP,NBPF9
						PDE4DIP
						PDE4DIP
						PDE4DIP
						PDE4DIP
						PDE4DIP
						PDE4DIP
						PDE4DIP
						PDE4DIP
						PDE4DIP
						PDE4DIP
						PDE4DIP
						NBPF20,PDE4DIP,NBPF9
						PDE4DIP
						PDE4DIP
						PDE4DIP
						PDE4DIP
						PDE4DIP
						PDE4DIP
						PDE4DIP
						PDE4DIP
						PDE4DIP
						PDE4DIP
						PDE4DIP
						PDE4DIP
						PDE4DIP
						PDE4DIP
						PDE4DIP
						PDE4DIP
						PDE4DIP
						PDE4DIP
						NBPF20,PDE4DIP,NBPF9
						NBPF20,PDE4DIP,NBPF9
						PDE4DIP
						PDE4DIP
						ITGA10
						BCL9
						MUC1
						NTRK1
						FCGR3A
						FCGR3A
						FCGR3A
						DDR2
						DDR2
						PBX1
						RXRG
						RXRG
						RNASEL
						TPR
						PIK3C2B
						PIK3C2B
						PIK3C2B
						PIK3C2B
						MDM4
						IKBKE
						IKBKE
						IKBKE
						IKBKE
						PARP1
						PARP1
						PARP1
						MTR
						MTR
						MTR
						MTR
						MTR
						MTR
						NCOA1
						NCOA1
						NCOA1
						ALK
						ALK
						ALK
						ALK
						ALK
						ALK
						ALK
						ALK
						ALK
						ALK
						ALK
						EML4
						EML4
						EML4
						EML4
						MSH2
						BCL11A
						TMEM127
						AFF3
						AFF3
						AFF3
						AFF3
						LRP1B
						LRP1B
						LRP1B
						LRP1B
						LRP1B
						LRP1B
						LRP1B
						LRP1B
[truncated: 7,008 more rows]
