# Supplementary material for: The potential, analysis and prospect of ctDNA sequencing in hepatocellular carcinoma
Source: PeerJ. 2022 May 17;10:e13473. doi: 10.7717/peerj.13473 (PMC9121877; doi:10.7717/peerj.13473)
Supplement: Supplemental Information 2 [file peerj-10-13473-s002.xlsx]

## Sheet: Sheet1
Supplemental Table 2：Comparison of high frequency mutation between primary and secondary liver cancer（TOP10）
Secondary liver cancer				Primary liver cancer
HSW		LBS		CZL		DEY		LRM		LXH		LZC		TCX		THP		ZFY
GeneName	count	GeneName	count	GeneName	count	GeneName	count	GeneName	count	GeneName	count	GeneName	count	GeneName	count	GeneName	count	GeneName	count
PDE4DIP	51	PDE4DIP	44	PDE4DIP	45	PDE4DIP	46	PDE4DIP	45	PDE4DIP	46	PDE4DIP	45	PDE4DIP	46	PDE4DIP	41	PDE4DIP	41
SYNE1	24	SYNE1	19	SYNE1	22	FANCA	19	SYNE1	25	SYNE1	16	SYNE1	22	SYNE1	23	SYNE1	24	SYNE1	20
KMT2C	14	PKHD1	15	KMT2C	13	SYNE1	19	FN1	12	FN1	13	KMT2C	14	FANCA	19	AKAP9	12	KMT2C	13
ALK	11	PIK3C2B	13	PKHD1	12	KMT2C	16	NOTCH1	10	ALK	11	RNF213	12	KMT2C	12	DST	12	AKAP9	11
FN1	11	BRCA2	10	AKAP9	11	ALK	11	PKHD1	10	RNF213	11	NOTCH1	10	LRP1B	12	LRP1B	12	ALK	11
LRP1B	11	NOTCH1	10	RNF213	11	FN1	11	ALK	9	SDHA	11	PKHD1	10	FN1	11	PKHD1	12	PIK3C2B	11
PKHD1	11	FN1	9	CASC5	10	LRP1B	10	FANCA	9	KMT2C	10	ALK	9	RNF213	11	NOTCH4	11	PKHD1	11
NOTCH1	9	KMT2C	9	FN1	10	PKHD1	10	HNF1A	9	UGT1A5	10	FN1	9	ABCC4	10	KMT2C	10	FN1	10
POLE	9	LRP1B	9	LAMA2	10	ABCC4	9	LRP1B	9	NOTCH1	9	HNF1A	9	IGF2R	10	ALK	9	NOTCH4	10
RET	9	ALK	8	LRP1B	10	NIN	9	APC	8	PKHD1	9	LAMA2	9	PKHD1	10	FN1	9	ABCC4	9
