# Supplementary material for: The potential, analysis and prospect of ctDNA sequencing in hepatocellular carcinoma
Source: PeerJ. 2022 May 17;10:e13473. doi: 10.7717/peerj.13473 (PMC9121877; doi:10.7717/peerj.13473)
Supplement: Supplemental Information 3 [file peerj-10-13473-s003.xlsx]

## Sheet: Supplemental Table 2
Supplemental Table 3：Summary of Likely Pathogenic mutations based on ACMG guidelines
CHROM	POS	ID	REF	ALT	QUAL	FILTER	GeneName	Func	Gene	ExonicFunc	AAChange
14	92505923	rs186074112	T	A	228	PASS	TRIP11	exonic	NM_004239	missense SNV	TRIP11:NM_004239:exon1:c.A107T:p.D36V
17	7577497	.	A	T	221	PASS	TP53	splicing	NM_000546,NM_001126112,NM_001126113,NM_001126114,NM_001126115,NM_001126116,NM_001126117,NM_001126118,NM_001276695,NM_001276696,NM_001276697,NM_001276698,NM_001276699,NM_001276760,NM_001276761	.	.
17	7578291	.	T	G	221	PASS	TP53	splicing	NM_000546,NM_001126112,NM_001126113,NM_001126114,NM_001126115,NM_001126116,NM_001126117,NM_001126118,NM_001276695,NM_001276696,NM_001276697,NM_001276698,NM_001276699,NM_001276760,NM_001276761	.	.
CHROM	POS	ID	REF	ALT	QUAL	FILTER	GeneName	Func	Gene	ExonicFunc	AAChange
17	7578275	.	G	A	222	PASS	TP53	exonic	NM_000546,NM_001126112,NM_001126113,NM_001126114,NM_001126115,NM_001126116,NM_001126117,NM_001126118,NM_001276695,NM_001276696,NM_001276697,NM_001276698,NM_001276699,NM_001276760,NM_001276761	stopgain	TP53:NM_001126115:exon2:c.C178T:p.Q60X,TP53:NM_001126116:exon2:c.C178T:p.Q60X,TP53:NM_001126117:exon2:c.C178T:p.Q60X,TP53:NM_001276697:exon2:c.C97T:p.Q33X,TP53:NM_001276698:exon2:c.C97T:p.Q33X,TP53:NM_001276699:exon2:c.C97T:p.Q33X,TP53:NM_001126118:exon5:c.C457T:p.Q153X,TP53:NM_000546:exon6:c.C574T:p.Q192X,TP53:NM_001126112:exon6:c.C574T:p.Q192X,TP53:NM_001126113:exon6:c.C574T:p.Q192X,TP53:NM_001…
17	7577507	.	T	A	222	PASS	TP53	exonic	NM_000546,NM_001126112,NM_001126113,NM_001126114,NM_001126115,NM_001126116,NM_001126117,NM_001126118,NM_001276695,NM_001276696,NM_001276697,NM_001276698,NM_001276699,NM_001276760,NM_001276761	missense SNV	TP53:NM_001126115:exon3:c.A378T:p.E126D,TP53:NM_001126116:exon3:c.A378T:p.E126D,TP53:NM_001126117:exon3:c.A378T:p.E126D,TP53:NM_001276697:exon3:c.A297T:p.E99D,TP53:NM_001276698:exon3:c.A297T:p.E99D,TP53:NM_001276699:exon3:c.A297T:p.E99D,TP53:NM_001126118:exon6:c.A657T:p.E219D,TP53:NM_000546:exon7:c.A774T:p.E258D,TP53:NM_001126112:exon7:c.A774T:p.E258D,TP53:NM_001126113:exon7:c.A774T:p.E258D,TP53:…
9	120475742	.	C	G	27.2252	PASS	TLR4	exonic	NM_003266,NM_138554,NM_138557	missense SNV	TLR4:NM_138557:exon2:c.C736G:p.L246V,TLR4:NM_138554:exon3:c.C1336G:p.L446V,TLR4:NM_003266:exon4:c.C1216G:p.L406V
6	152469504	rs267600861	C	T	221	PASS	SYNE1	exonic	NM_033071,NM_182961	missense SNV	SYNE1:NM_033071:exon136:c.G24439A:p.D8147N,SYNE1:NM_182961:exon137:c.G24652A:p.D8218N
6	152557969	.	G	T	221	PASS	SYNE1	exonic	NM_033071,NM_182961	missense SNV	SYNE1:NM_033071:exon108:c.C19969A:p.R6657S,SYNE1:NM_182961:exon109:c.C20182A:p.R6728S
CHROM	POS	ID	REF	ALT	QUAL	FILTER	GeneName	Func	Gene	ExonicFunc	AAChange
12	111886081	rs199803113	T	C	222	PASS	SH2B3	exonic	NM_005475	missense SNV	SH2B3:NM_005475:exon8:c.T1703C:p.I568T
10	43601830	rs34682185	G	A	196	PASS	RET	exonic	NM_020630,NM_020975	missense SNV	RET:NM_020630:exon5:c.G874A:p.V292M,RET:NM_020975:exon5:c.G874A:p.V292M
10	43620335	rs17158558	C	T	222	PASS	RET	exonic	NM_020630,NM_020975	missense SNV	RET:NM_020630:exon18:c.C2944T:p.R982C,RET:NM_020975:exon18:c.C2944T:p.R982C
10	43601830	rs34682185	G	A	221	PASS	RET	exonic	NM_020630,NM_020975	missense SNV	RET:NM_020630:exon5:c.G874A:p.V292M,RET:NM_020975:exon5:c.G874A:p.V292M
10	43620335	rs17158558	C	T	221	PASS	RET	exonic	NM_020630,NM_020975	missense SNV	RET:NM_020630:exon18:c.C2944T:p.R982C,RET:NM_020975:exon18:c.C2944T:p.R982C
8	145741602	rs34633809	C	T	222	PASS	RECQL4	exonic	NM_004260	missense SNV	RECQL4:NM_004260:exon5:c.G901A:p.E301K
13	49037865	.	A	G	222	PASS	RB1	splicing	NM_000321	.	.
CHROM	POS	ID	REF	ALT	QUAL	FILTER	GeneName	Func	Gene	ExonicFunc	AAChange
8	48694956	rs55769154	A	G	222	PASS	PRKDC	exonic	NM_001081640,NM_006904	unknown	UNKNOWN
8	48802944	.	A	G	222	PASS	PRKDC	exonic	NM_001081640,NM_006904	unknown	UNKNOWN
19	50910318	rs201804732	C	T	222	PASS	POLD1	exonic	NM_001256849,NM_002691	missense SNV	POLD1:NM_001256849:exon13:c.C1573T:p.R525W,POLD1:NM_002691:exon13:c.C1573T:p.R525W
CHROM	POS	ID	REF	ALT	QUAL	FILTER	GeneName	Func	Gene	ExonicFunc	AAChange
5	149512332	rs200684708	G	A	221	PASS	PDGFRB	exonic	NM_002609	missense SNV	PDGFRB:NM_002609:exon7:c.C1108T:p.R370C
5	149512332	rs200684708	G	A	222	PASS	PDGFRB	exonic	NM_002609	missense SNV	PDGFRB:NM_002609:exon7:c.C1108T:p.R370C
1	164776885	.	G	T	222	PASS	PBX1	exonic	NM_001204961,NM_001204963,NM_002585	missense SNV	PBX1:NM_001204961:exon5:c.G808T:p.A270S,PBX1:NM_001204963:exon5:c.G808T:p.A270S,PBX1:NM_002585:exon5:c.G808T:p.A270S
CHROM	POS	ID	REF	ALT	QUAL	FILTER	GeneName	Func	Gene	ExonicFunc	AAChange
9	134027192	rs190788992	A	G	222	PASS	NUP214	exonic	NM_005085	missense SNV	NUP214:NM_005085:exon17:c.A2347G:p.R783G
9	139395201	.	A	C	24.0543	PASS	NOTCH1	exonic	NM_017617	missense SNV	NOTCH1:NM_017617:exon31:c.T5737G:p.F1913V
6	129419442	.	C	T	222	PASS	LAMA2	exonic	NM_000426,NM_001079823	missense SNV	LAMA2:NM_000426:exon4:c.C521T:p.T174M,LAMA2:NM_001079823:exon4:c.C521T:p.T174M
6	129465086	.	A	G	221	PASS	LAMA2	exonic	NM_000426,NM_001079823	missense SNV	LAMA2:NM_000426:exon5:c.A680G:p.D227G,LAMA2:NM_001079823:exon5:c.A680G:p.D227G
6	129837463	rs200796753	G	T	216	PASS	LAMA2	exonic	NM_000426,NM_001079823	missense SNV	LAMA2:NM_001079823:exon64:c.G9328T:p.V3110F,LAMA2:NM_000426:exon65:c.G9340T:p.V3114F
CHROM	POS	ID	REF	ALT	QUAL	FILTER	GeneName	Func	Gene	ExonicFunc	AAChange
10	76780433	.	G	A	222	PASS	KAT6B	exonic	NM_001256468,NM_001256469,NM_012330	missense SNV	KAT6B:NM_001256468:exon14:c.G2174A:p.S725N,KAT6B:NM_001256469:exon14:c.G1847A:p.S616N,KAT6B:NM_012330:exon14:c.G2723A:p.S908N
10	76789416	rs140992439	C	T	222	PASS	KAT6B	exonic	NM_001256468,NM_001256469,NM_012330	missense SNV	KAT6B:NM_001256468:exon18:c.C4285T:p.R1429C,KAT6B:NM_001256469:exon18:c.C3958T:p.R1320C,KAT6B:NM_012330:exon18:c.C4834T:p.R1612C
19	17943465	.	G	A	21.7998	PASS	JAK3	exonic	NM_000215	missense SNV	JAK3:NM_000215:exon19:c.C2543T:p.T848I
6	407575	.	C	T	222	PASS	IRF4	exonic	NM_001195286,NM_002460	missense SNV	IRF4:NM_001195286:exon9:c.C1330T:p.R444C,IRF4:NM_002460:exon9:c.C1333T:p.R445C
2	209101885	rs566072712	C	T	222	PASS	IDH1	exonic	NM_001282386,NM_001282387,NM_005896	missense SNV	IDH1:NM_001282386:exon10:c.G1163A:p.R388H,IDH1:NM_001282387:exon10:c.G1163A:p.R388H,IDH1:NM_005896:exon10:c.G1163A:p.R388H
3	71021303	rs76145927	T	C	222	PASS	FOXP1	exonic	NM_001244810	missense SNV	FOXP1:NM_001244810:exon18:c.A1559G:p.H520R
3	71021303	rs76145927	T	C	222	PASS	FOXP1	exonic	NM_001244810	missense SNV	FOXP1:NM_001244810:exon18:c.A1559G:p.H520R
5	180030278	rs201796032	C	T	222	PASS	FLT4	exonic	NM_182925	missense SNV	FLT4:NM_182925:exon30:c.G4006A:p.E1336K
4	1805473	rs188723332	G	A	222	PASS	FGFR3	exonic	NM_000142	missense SNV	FGFR3:NM_000142:exon8:c.G985A:p.V329I
CHROM	POS	ID	REF	ALT	QUAL	FILTER	GeneName	Func	Gene	ExonicFunc	AAChange
4	1804706	.	C	A	222	PASS	FGFR3	exonic	NM_001163213	missense SNV	FGFR3:NM_001163213:exon8:c.C996A:p.D332E
3	10140458	.	G	C	151	PASS	FANCD2	exonic	NM_001018115,NM_033084	missense SNV	FANCD2:NM_001018115:exon43:c.G4240C:p.D1414H,FANCD2:NM_033084:exon43:c.G4240C:p.D1414H
16	89846317	rs201323171	C	T	222	PASS	FANCA	exonic	NM_000135,NM_001286167	missense SNV	FANCA:NM_000135:exon18:c.G1675A:p.E559K,FANCA:NM_001286167:exon18:c.G1675A:p.E559K
13	103510736	rs56255799	C	T	222	PASS	ERCC5,BIVM-ERCC5	exonic	NM_000123,NM_001204425	missense SNV	ERCC5:NM_000123:exon6:c.C640T:p.R214C,BIVM-ERCC5:NM_001204425:exon14:c.C2002T:p.R668C
19	45868349	rs150000483	C	T	213	PASS	ERCC2	exonic	NM_000400,NM_001130867	missense SNV	ERCC2:NM_001130867:exon5:c.G356A:p.R119Q,ERCC2:NM_000400:exon6:c.G428A:p.R143Q
12	56478854	.	G	A	222	PASS	ERBB3	exonic	NM_001005915,NM_001982	missense SNV	ERBB3:NM_001005915:exon3:c.G310A:p.V104M,ERBB3:NM_001982:exon3:c.G310A:p.V104M
17	37868208	.	C	T	222	PASS	ERBB2	exonic	NM_001005862,NM_001289936,NM_001289937,NM_001289938,NM_004448	missense SNV	ERBB2:NM_001289937:exon8:c.C929T:p.S310F,ERBB2:NM_004448:exon8:c.C929T:p.S310F,ERBB2:NM_001005862:exon11:c.C839T:p.S280F,ERBB2:NM_001289938:exon11:c.C839T:p.S280F,ERBB2:NM_001289936:exon12:c.C884T:p.S295F
CHROM	POS	ID	REF	ALT	QUAL	FILTER	GeneName	Func	Gene	ExonicFunc	AAChange
9	439392	rs117109271	A	G	222	PASS	DOCK8	splicing	NM_001190458,NM_001193536,NM_203447	.	.
19	10260337	rs74505694	G	A	222	PASS	DNMT1	splicing	NM_001130823,NM_001379	.	.
19	10257115	rs550380640	G	A	222	PASS	DNMT1	exonic	NM_001130823,NM_001379	missense SNV	DNMT1:NM_001379:exon27:c.C2758T:p.R920W,DNMT1:NM_001130823:exon28:c.C2806T:p.R936W
16	50827496	rs199624138	A	G	222	PASS	CYLD	exonic	NM_001042355,NM_001042412,NM_015247	missense SNV	CYLD:NM_001042355:exon16:c.A2381G:p.Y794C,CYLD:NM_001042412:exon16:c.A2381G:p.Y794C,CYLD:NM_015247:exon18:c.A2390G:p.Y797C
16	68867343	rs142927667	G	A	222	PASS	CDH1	exonic	NM_004360	missense SNV	CDH1:NM_004360:exon16:c.G2590A:p.E864K
CHROM	POS	ID	REF	ALT	QUAL	FILTER	GeneName	Func	Gene	ExonicFunc	AAChange
11	119155731	rs373989524	C	T	222	PASS	CBL	exonic	NM_005188	missense SNV	CBL:NM_005188:exon10:c.C1484T:p.P495L
2	202150044	.	A	C	221	PASS	CASP8	splicing	NM_001080124,NM_001080125,NM_001228,NM_033355,NM_033356	.	.
10	88678970	.	C	A	222	PASS	BMPR1A	exonic	NM_004329	missense SNV	BMPR1A:NM_004329:exon10:c.C910A:p.Q304K
22	23653939	.	C	T	45.6877	PASS	BCR	exonic	NM_004327,NM_021574	missense SNV	BCR:NM_021574:exon18:c.C3106T:p.R1036C,BCR:NM_004327:exon19:c.C3238T:p.R1080C
5	112175271	.	C	A	176	PASS	APC	exonic	NM_000038,NM_001127510,NM_001127511	stopgain	APC:NM_001127511:exon14:c.C3926A:p.S1309X,APC:NM_000038:exon16:c.C3980A:p.S1327X,APC:NM_001127510:exon17:c.C3980A:p.S1327X
1	179086577	.	A	C	137	PASS	ABL2	exonic	NM_001136000,NM_001136001,NM_001168236,NM_001168237,NM_001168238,NM_001168239,NM_005158,NM_007314	missense SNV	ABL2:NM_001136001:exon7:c.T1235G:p.L412W,ABL2:NM_001168236:exon7:c.T1235G:p.L412W,ABL2:NM_001168238:exon7:c.T1235G:p.L412W,ABL2:NM_001168239:exon7:c.T1190G:p.L397W,ABL2:NM_001136000:exon8:c.T1253G:p.L418W,ABL2:NM_001168237:exon8:c.T1298G:p.L433W,ABL2:NM_005158:exon8:c.T1253G:p.L418W,ABL2:NM_007314:exon8:c.T1298G:p.L433W
2	169851916	.	A	T	222	PASS	ABCB11	exonic	NM_003742	missense SNV	ABCB11:NM_003742:exon7:c.T554A:p.M185K
