# Supplementary material for: The potential, analysis and prospect of ctDNA sequencing in hepatocellular carcinoma
Source: PeerJ. 2022 May 17;10:e13473. doi: 10.7717/peerj.13473 (PMC9121877; doi:10.7717/peerj.13473)
Supplement: Supplemental Information 4 [file peerj-10-13473-s004.xlsx]

## Sheet: Supplemental Table 3
Supplemental Table 4：GO Annotation for pathogenic and likely pathogenic genes
Category	Term	Count	%	PValue	Genes	List Total	Pop Hits	Pop Total	Fold Enrichment	Bonferroni	Benjamini	FDR
GOTERM_BP_DIRECT	GO:0018108~peptidyl-tyrosine phosphorylation	9	22.5	1.91405e-09	BCR, PDGFRB, RET, ERBB3, FLT4, ERBB2, ABL2, FGFR3, JAK3	40	153	16792	24.6941	1.58292e-06	1.581e-06	1.54655e-06
GOTERM_BP_DIRECT	GO:0045944~positive regulation of transcription from RNA polymerase II promoter	11	27.5	5.9421e-05	RB1, NOTCH1, KAT6B, PRKDC, IRF4, ERCC2, TP53, TLR4, PBX1, BMPR1A, FOXP1	40	981	16792	4.70724	0.0479547	0.0194859	0.0190613
GOTERM_BP_DIRECT	GO:0007169~transmembrane receptor protein tyrosine kinase signaling pathway	5	12.5	7.0772e-05	RET, ERBB3, FLT4, ERBB2, ABL2	40	96	16792	21.8646	0.0568505	0.0194859	0.0190613
GOTERM_BP_DIRECT	GO:0045893~positive regulation of transcription, DNA-templated	8	20	0.000160706	RB1, RET, NOTCH1, KAT6B, CDH1, IRF4, ERCC2, TP53	40	515	16792	6.52117	0.12446	0.0331859	0.0324627
GOTERM_BP_DIRECT	GO:0043547~positive regulation of GTPase activity	8	20	0.000283526	BCR, PDGFRB, RET, ERBB3, DOCK8, ERBB2, FGFR3, JAK3	40	565	16792	5.94407	0.209041	0.0426783	0.0417483
GOTERM_BP_DIRECT	GO:0000165~MAPK cascade	6	15	0.000332096	PDGFRB, RET, ERBB3, ERBB2, FGFR3, JAK3	40	262	16792	9.61374	0.240191	0.0426783	0.0417483
GOTERM_BP_DIRECT	GO:0050679~positive regulation of epithelial cell proliferation	4	10	0.000361681	NOTCH1, ERBB2, BMPR1A, FOXP1	40	60	16792	27.9867	0.258562	0.0426783	0.0417483
GOTERM_BP_DIRECT	GO:0032496~response to lipopolysaccharide	5	12.5	0.000552676	BCR, NOTCH1, CASP8, TLR4, FOXP1	40	164	16792	12.7988	0.36694	0.0570638	0.0558203
GOTERM_BP_DIRECT	GO:0046777~protein autophosphorylation	5	12.5	0.000660969	BCR, PDGFRB, FLT4, ERBB2, FGFR3	40	172	16792	12.2035	0.421202	0.0606623	0.0593403
GOTERM_BP_DIRECT	GO:0014066~regulation of phosphatidylinositol 3-kinase signaling	4	10	0.0007812	PDGFRB, ERBB3, ERBB2, FGFR3	40	78	16792	21.5282	0.476022	0.0645271	0.063121
GOTERM_BP_DIRECT	GO:0006295~nucleotide-excision repair, DNA incision, 3'-to lesion	3	7.5	0.00128944	ERCC2, ERCC5, BIVM-ERCC5	40	23	16792	54.7565	0.655979	0.0923495	0.090337
GOTERM_BP_DIRECT	GO:0046854~phosphatidylinositol phosphorylation	4	10	0.00134164	PDGFRB, ERBB3, ERBB2, FGFR3	40	94	16792	17.8638	0.670533	0.0923495	0.090337
GOTERM_BP_DIRECT	GO:0048015~phosphatidylinositol-mediated signaling	4	10	0.00189421	PDGFRB, ERBB3, ERBB2, FGFR3	40	106	16792	15.8415	0.791538	0.112834	0.110375
GOTERM_BP_DIRECT	GO:2000145~regulation of cell motility	3	7.5	0.00191245	ERBB3, ERBB2, ABL2	40	28	16792	44.9786	0.794664	0.112834	0.110375
GOTERM_BP_DIRECT	GO:0006281~DNA repair	5	12.5	0.00209408	RECQL4, FANCD2, POLD1, FANCA, ERCC5	40	235	16792	8.93191	0.823357	0.115314	0.112801
GOTERM_BP_DIRECT	GO:0010332~response to gamma radiation	3	7.5	0.0023423	FANCD2, PRKDC, TP53	40	31	16792	40.6258	0.856203	0.120921	0.118286
GOTERM_BP_DIRECT	GO:0010628~positive regulation of gene expression	5	12.5	0.00310189	DNMT1, ERBB3, ERBB2, TP53, TLR4	40	262	16792	8.01145	0.923407	0.150715	0.147431
GOTERM_BP_DIRECT	GO:0006296~nucleotide-excision repair, DNA incision, 5'-to lesion	3	7.5	0.00332544	POLD1, ERCC2, ERCC5	40	37	16792	34.0378	0.936373	0.152378	0.149057
GOTERM_BP_DIRECT	GO:0033683~nucleotide-excision repair, DNA incision	3	7.5	0.00350506	POLD1, ERCC2, ERCC5	40	38	16792	33.1421	0.945184	0.152378	0.149057
GOTERM_BP_DIRECT	GO:0043066~negative regulation of apoptotic process	6	15	0.0038496	PDGFRB, PRKDC, FLT4, ERCC5, CBL, TP53	40	455	16792	5.53582	0.958818	0.152829	0.149498
GOTERM_BP_DIRECT	GO:0006468~protein phosphorylation	6	15	0.00388571	BCR, RET, ERBB2, ERCC2, JAK3, BMPR1A	40	456	16792	5.52368	0.960035	0.152829	0.149498
GOTERM_BP_DIRECT	GO:0006289~nucleotide-excision repair	3	7.5	0.0040705	ERCC2, BIVM-ERCC5, TP53	40	41	16792	30.7171	0.965719	0.152829	0.149498
GOTERM_BP_DIRECT	GO:0030155~regulation of cell adhesion	3	7.5	0.00446943	RET, LAMA2, ABL2	40	43	16792	29.2884	0.975388	0.160511	0.157013
GOTERM_BP_DIRECT	GO:0043065~positive regulation of apoptotic process	5	12.5	0.00502137	PDGFRB, NOTCH1, APC, PRKDC, TP53	40	300	16792	6.99667	0.984441	0.172819	0.169053
GOTERM_BP_DIRECT	GO:2000348~regulation of CD40 signaling pathway	2	5	0.00695185	FANCD2, FANCA	40	3	16792	279.867	0.996878	0.228081	0.223111
GOTERM_BP_DIRECT	GO:0016477~cell migration	4	10	0.00736443	PDGFRB, APC, ABL2, JAK3	40	172	16792	9.76279	0.997786	0.228081	0.223111
GOTERM_BP_DIRECT	GO:0070374~positive regulation of ERK1 and ERK2 cascade	4	10	0.00772192	PDGFRB, FLT4, FGFR3, TLR4	40	175	16792	9.59543	0.998356	0.228081	0.223111
GOTERM_BP_DIRECT	GO:0007507~heart development	4	10	0.00872499	NOTCH1, ERBB3, PRKDC, ERBB2	40	183	16792	9.17596	0.999288	0.228081	0.223111
GOTERM_BP_DIRECT	GO:0030335~positive regulation of cell migration	4	10	0.00885551	PDGFRB, RET, NOTCH1, APC	40	184	16792	9.12609	0.999361	0.228081	0.223111
GOTERM_BP_DIRECT	GO:0042127~regulation of cell proliferation	4	10	0.00898717	DNMT1, ERBB3, FANCA, ABL2	40	185	16792	9.07676	0.999428	0.228081	0.223111
GOTERM_BP_DIRECT	GO:0001701~in utero embryonic development	4	10	0.00925396	NOTCH1, ERCC2, BMPR1A, FOXP1	40	187	16792	8.97968	0.999542	0.228081	0.223111
GOTERM_BP_DIRECT	GO:0033152~immunoglobulin V(D)J recombination	2	5	0.00925865	PRKDC, FOXP1	40	4	16792	209.9	0.999544	0.228081	0.223111
GOTERM_BP_DIRECT	GO:0045589~regulation of regulatory T cell differentiation	2	5	0.00925865	FANCD2, FANCA	40	4	16792	209.9	0.999544	0.228081	0.223111
GOTERM_BP_DIRECT	GO:0050727~regulation of inflammatory response	3	7.5	0.00938831	FANCD2, FANCA, FOXP1	40	63	16792	19.9905	0.999591	0.228081	0.223111
GOTERM_BP_DIRECT	GO:0014068~positive regulation of phosphatidylinositol 3-kinase signaling	3	7.5	0.00996972	PDGFRB, ERBB3, CBL	40	65	16792	19.3754	0.999748	0.235285	0.230158
GOTERM_BP_DIRECT	GO:0007265~Ras protein signal transduction	3	7.5	0.0114914	RB1, DNMT1, TP53	40	70	16792	17.9914	0.999929	0.258074	0.25245
GOTERM_BP_DIRECT	GO:0060043~regulation of cardiac muscle cell proliferation	2	5	0.0115602	BMPR1A, FOXP1	40	5	16792	167.92	0.999933	0.258074	0.25245
GOTERM_BP_DIRECT	GO:0006283~transcription-coupled nucleotide-excision repair	3	7.5	0.0127777	POLD1, ERCC2, ERCC5	40	74	16792	17.0189	0.999976	0.277747	0.271694
GOTERM_BP_DIRECT	GO:0042060~wound healing	3	7.5	0.0148192	PDGFRB, ERBB3, ERBB2	40	80	16792	15.7425	0.999996	0.313863	0.307023
GOTERM_BP_DIRECT	GO:0007167~enzyme linked receptor protein signaling pathway	2	5	0.0207146	ERBB2, JAK3	40	9	16792	93.2889	1	0.397912	0.389241
GOTERM_BP_DIRECT	GO:0010863~positive regulation of phospholipase C activity	2	5	0.0207146	PDGFRB, ABL2	40	9	16792	93.2889	1	0.397912	0.389241
GOTERM_BP_DIRECT	GO:0000733~DNA strand renaturation	2	5	0.0207146	RECQL4, TP53	40	9	16792	93.2889	1	0.397912	0.389241
GOTERM_BP_DIRECT	GO:0032886~regulation of microtubule-based process	2	5	0.0207146	APC, ERBB2	40	9	16792	93.2889	1	0.397912	0.389241
GOTERM_BP_DIRECT	GO:0008284~positive regulation of cell proliferation	5	12.5	0.0223829	PDGFRB, NOTCH1, FLT4, FGFR3, PBX1	40	466	16792	4.50429	1	0.420189	0.411032
GOTERM_BP_DIRECT	GO:0042116~macrophage activation	2	5	0.0229902	TLR4, FOXP1	40	10	16792	83.96	1	0.421998	0.412802
GOTERM_BP_DIRECT	GO:0042551~neuron maturation	2	5	0.0252607	RB1, RET	40	11	16792	76.3273	1	0.453594	0.44371
GOTERM_BP_DIRECT	GO:0009650~UV protection	2	5	0.027526	ERCC2, ERCC5	40	12	16792	69.9667	1	0.480068	0.469607
GOTERM_BP_DIRECT	GO:0045892~negative regulation of transcription, DNA-templated	5	12.5	0.0278974	RB1, NOTCH1, KAT6B, TP53, FOXP1	40	499	16792	4.20641	1	0.480068	0.469607
GOTERM_BP_DIRECT	GO:0006461~protein complex assembly	3	7.5	0.0296888	APC, FANCA, TP53	40	116	16792	10.8569	1	0.492069	0.481346
GOTERM_BP_DIRECT	GO:0045651~positive regulation of macrophage differentiation	2	5	0.0297863	RB1, CASP8	40	13	16792	64.5846	1	0.492069	0.481346
GOTERM_BP_DIRECT	GO:0006366~transcription from RNA polymerase II promoter	5	12.5	0.0304635	IRF4, ERCC2, TRIP11, TP53, PBX1	40	513	16792	4.09162	1	0.493389	0.482637
GOTERM_BP_DIRECT	GO:0016032~viral process	4	10	0.0318726	NUP214, RB1, ERCC2, TP53	40	299	16792	5.61605	1	0.506285	0.495252
GOTERM_BP_DIRECT	GO:0051726~regulation of cell cycle	3	7.5	0.0335538	NUP214, BCR, RB1	40	124	16792	10.1565	1	0.520327	0.508988
GOTERM_BP_DIRECT	GO:0008585~female gonad development	2	5	0.0342914	IDH1, FANCA	40	15	16792	55.9733	1	0.520327	0.508988
GOTERM_BP_DIRECT	GO:0003203~endocardial cushion morphogenesis	2	5	0.0365363	NOTCH1, BMPR1A	40	16	16792	52.475	1	0.520327	0.508988
GOTERM_BP_DIRECT	GO:0035162~embryonic hemopoiesis	2	5	0.0365363	SH2B3, PBX1	40	16	16792	52.475	1	0.520327	0.508988
GOTERM_BP_DIRECT	GO:0003222~ventricular trabecula myocardium morphogenesis	2	5	0.0365363	NOTCH1, BMPR1A	40	16	16792	52.475	1	0.520327	0.508988
GOTERM_BP_DIRECT	GO:0050768~negative regulation of neurogenesis	2	5	0.0365363	NOTCH1, BMPR1A	40	16	16792	52.475	1	0.520327	0.508988
GOTERM_BP_DIRECT	GO:0036120~cellular response to platelet-derived growth factor stimulus	2	5	0.0410108	PDGFRB, CBL	40	18	16792	46.6444	1	0.555327	0.543225
GOTERM_BP_DIRECT	GO:0070266~necroptotic process	2	5	0.0410108	CYLD, TLR4	40	18	16792	46.6444	1	0.555327	0.543225
GOTERM_BP_DIRECT	GO:0001708~cell fate specification	2	5	0.0410108	NOTCH1, APC	40	18	16792	46.6444	1	0.555327	0.543225
GOTERM_BP_DIRECT	GO:0007050~cell cycle arrest	3	7.5	0.0423753	RB1, APC, TP53	40	141	16792	8.93191	1	0.564548	0.552246
GOTERM_BP_DIRECT	GO:0008045~motor neuron axon guidance	2	5	0.0432405	ERBB2, FOXP1	40	19	16792	44.1895	1	0.566931	0.554576
GOTERM_BP_DIRECT	GO:0097150~neuronal stem cell population maintenance	2	5	0.0476847	NOTCH1, FANCD2	40	21	16792	39.981	1	0.596781	0.583776
GOTERM_BP_DIRECT	GO:0006921~cellular component disassembly involved in execution phase of apoptosis	2	5	0.0476847	CASP8, APC	40	21	16792	39.981	1	0.596781	0.583776
GOTERM_BP_DIRECT	GO:0006293~nucleotide-excision repair, preincision complex stabilization	2	5	0.0476847	ERCC2, ERCC5	40	21	16792	39.981	1	0.596781	0.583776
GOTERM_BP_DIRECT	GO:0007165~signal transduction	7	17.5	0.0496565	BCR, PDGFRB, RET, ERBB3, ERBB2, ABL2, SH2B3	40	1161	16792	2.53109	1	0.606129	0.59292
GOTERM_BP_DIRECT	GO:0060045~positive regulation of cardiac muscle cell proliferation	2	5	0.0498992	NOTCH1, BMPR1A	40	22	16792	38.1636	1	0.606129	0.59292
GOTERM_BP_DIRECT	GO:0035924~cellular response to vascular endothelial growth factor stimulus	2	5	0.0521088	NOTCH1, FLT4	40	23	16792	36.5043	1	0.614205	0.600821
GOTERM_BP_DIRECT	GO:0008283~cell proliferation	4	10	0.0527102	PRKDC, ERBB2, ERCC2, TP53	40	366	16792	4.58798	1	0.614205	0.600821
GOTERM_BP_DIRECT	GO:0007422~peripheral nervous system development	2	5	0.0543133	ERBB3, ERBB2	40	24	16792	34.9833	1	0.614205	0.600821
GOTERM_BP_DIRECT	GO:0090090~negative regulation of canonical Wnt signaling pathway	3	7.5	0.0549196	CYLD, NOTCH1, APC	40	163	16792	7.72638	1	0.614205	0.600821
GOTERM_BP_DIRECT	GO:0048709~oligodendrocyte differentiation	2	5	0.0565128	NOTCH1, ERBB2	40	25	16792	33.584	1	0.614205	0.600821
GOTERM_BP_DIRECT	GO:0070423~nucleotide-binding oligomerization domain containing signaling pathway	2	5	0.0565128	CYLD, CASP8	40	25	16792	33.584	1	0.614205	0.600821
GOTERM_BP_DIRECT	GO:0002040~sprouting angiogenesis	2	5	0.0565128	NOTCH1, FLT4	40	25	16792	33.584	1	0.614205	0.600821
GOTERM_BP_DIRECT	GO:0051090~regulation of sequence-specific DNA binding transcription factor activity	2	5	0.0565128	FANCD2, FANCA	40	25	16792	33.584	1	0.614205	0.600821
GOTERM_BP_DIRECT	GO:0002053~positive regulation of mesenchymal cell proliferation	2	5	0.0587074	BMPR1A, FOXP1	40	26	16792	32.2923	1	0.62977	0.616046
GOTERM_BP_DIRECT	GO:0014065~phosphatidylinositol 3-kinase signaling	2	5	0.060897	ERBB3, ERBB2	40	27	16792	31.0963	1	0.640254	0.626302
GOTERM_BP_DIRECT	GO:0035666~TRIF-dependent toll-like receptor signaling pathway	2	5	0.0630816	CASP8, TLR4	40	28	16792	29.9857	1	0.640254	0.626302
GOTERM_BP_DIRECT	GO:0043388~positive regulation of DNA binding	2	5	0.0630816	IRF4, ERCC2	40	28	16792	29.9857	1	0.640254	0.626302
GOTERM_BP_DIRECT	GO:0021983~pituitary gland development	2	5	0.0630816	CDH1, BMPR1A	40	28	16792	29.9857	1	0.640254	0.626302
GOTERM_BP_DIRECT	GO:0008285~negative regulation of cell proliferation	4	10	0.0637387	RB1, NOTCH1, APC, TP53	40	396	16792	4.2404	1	0.640254	0.626302
GOTERM_BP_DIRECT	GO:0048008~platelet-derived growth factor receptor signaling pathway	2	5	0.0652612	BCR, PDGFRB	40	29	16792	28.9517	1	0.640254	0.626302
GOTERM_BP_DIRECT	GO:0006294~nucleotide-excision repair, preincision complex assembly	2	5	0.0652612	ERCC2, ERCC5	40	29	16792	28.9517	1	0.640254	0.626302
GOTERM_BP_DIRECT	GO:1900740~positive regulation of protein insertion into mitochondrial membrane involved in apoptotic signaling pathway	2	5	0.067436	CASP8, TP53	40	30	16792	27.9867	1	0.640254	0.626302
GOTERM_BP_DIRECT	GO:0010803~regulation of tumor necrosis factor-mediated signaling pathway	2	5	0.067436	CYLD, CASP8	40	30	16792	27.9867	1	0.640254	0.626302
GOTERM_BP_DIRECT	GO:2000379~positive regulation of reactive oxygen species metabolic process	2	5	0.067436	PDGFRB, TP53	40	30	16792	27.9867	1	0.640254	0.626302
GOTERM_BP_DIRECT	GO:0043552~positive regulation of phosphatidylinositol 3-kinase activity	2	5	0.0696057	PDGFRB, FGFR3	40	31	16792	27.0839	1	0.653345	0.639107
GOTERM_BP_DIRECT	GO:0046677~response to antibiotic	2	5	0.0717706	CASP8, TP53	40	32	16792	26.2375	1	0.666096	0.65158
GOTERM_BP_DIRECT	GO:0051402~neuron apoptotic process	2	5	0.0739306	RB1, ERBB3	40	33	16792	25.4424	1	0.678518	0.663732
GOTERM_BP_DIRECT	GO:0030198~extracellular matrix organization	3	7.5	0.0758218	LAMA2, CDH1, ERCC2	40	196	16792	6.42551	1	0.683117	0.66823
GOTERM_BP_DIRECT	GO:0030282~bone mineralization	2	5	0.0760856	ERCC2, FGFR3	40	34	16792	24.6941	1	0.683117	0.66823
GOTERM_BP_DIRECT	GO:0045087~innate immune response	4	10	0.0774326	CYLD, ABL2, JAK3, TLR4	40	430	16792	3.90512	1	0.687476	0.672495
GOTERM_BP_DIRECT	GO:0006284~base-excision repair	2	5	0.0782358	RECQL4, TP53	40	35	16792	23.9886	1	0.687476	0.672495
GOTERM_BP_DIRECT	GO:0048536~spleen development	2	5	0.0803811	PRKDC, PBX1	40	36	16792	23.3222	1	0.698893	0.683663
GOTERM_BP_DIRECT	GO:0006974~cellular response to DNA damage stimulus	3	7.5	0.0839656	APC, CBL, TP53	40	208	16792	6.05481	1	0.713539	0.697989
GOTERM_BP_DIRECT	GO:0000122~negative regulation of transcription from RNA polymerase II promoter	5	12.5	0.0845403	RB1, DNMT1, NOTCH1, TP53, FOXP1	40	720	16792	2.91528	1	0.713539	0.697989
GOTERM_BP_DIRECT	GO:0038128~ERBB2 signaling pathway	2	5	0.0846571	ERBB3, ERBB2	40	38	16792	22.0947	1	0.713539	0.697989
GOTERM_BP_DIRECT	GO:0001756~somitogenesis	2	5	0.0867879	PRKDC, BMPR1A	40	39	16792	21.5282	1	0.716868	0.701246
GOTERM_BP_DIRECT	GO:0002062~chondrocyte differentiation	2	5	0.0867879	FGFR3, BMPR1A	40	39	16792	21.5282	1	0.716868	0.701246
GOTERM_BP_DIRECT	GO:0007346~regulation of mitotic cell cycle	2	5	0.0889138	RB1, CYLD	40	40	16792	20.99	1	0.720027	0.704337
GOTERM_BP_DIRECT	GO:0038083~peptidyl-tyrosine autophosphorylation	2	5	0.0889138	ABL2, JAK3	40	40	16792	20.99	1	0.720027	0.704337
GOTERM_BP_DIRECT	GO:0009411~response to UV	2	5	0.0931511	POLD1, ERCC5	40	42	16792	19.9905	1	0.742329	0.726153
GOTERM_BP_DIRECT	GO:0014823~response to activity	2	5	0.0952626	PRKDC, CBL	40	43	16792	19.5256	1	0.742329	0.726153
GOTERM_BP_DIRECT	GO:0043966~histone H3 acetylation	2	5	0.0952626	KAT6B, IRF4	40	43	16792	19.5256	1	0.742329	0.726153
GOTERM_BP_DIRECT	GO:0048538~thymus development	2	5	0.0952626	PRKDC, PBX1	40	43	16792	19.5256	1	0.742329	0.726153
GOTERM_BP_DIRECT	GO:0034644~cellular response to UV	2	5	0.0973693	POLD1, TP53	40	44	16792	19.0818	1	0.751654	0.735275
GOTERM_MF_DIRECT	GO:0004713~protein tyrosine kinase activity	8	20	2.00426e-08	BCR, PDGFRB, RET, ERBB3, ERBB2, ABL2, FGFR3, JAK3	40	133	16881	25.385	3.42729e-06	3.42729e-06	3.24691e-06
GOTERM_MF_DIRECT	GO:0005515~protein binding	36	90	5.66928e-07	RET, RB1, DNMT1, NOTCH1, PRKDC, FLT4, DOCK8, CBL, SYNE1, RECQL4, CASP8, ERBB3, CDH1, POLD1, ERBB2, ABL2, JAK3, SH2B3, NUP214, PDGFRB, FANCA, PBX1, FOXP1, BCR, CYLD, APC, FANCD2, IRF4, KAT6B, ERCC2, TRIP11, ERCC5, FGFR3, TP53, TLR4, BMPR1A	40	8785	16881	1.72941	9.694e-05	4.84723e-05	4.59212e-05
GOTERM_MF_DIRECT	GO:0005524~ATP binding	15	37.5	3.10298e-06	PDGFRB, RET, PRKDC, FLT4, ABCB11, BCR, RECQL4, ERBB3, ERBB2, ERCC2, ABL2, JAK3, FGFR3, TP53, BMPR1A	40	1495	16881	4.23436	0.00053047	0.00017687	0.000167561
GOTERM_MF_DIRECT	GO:0005088~Ras guanyl-nucleotide exchange factor activity	6	15	6.43349e-06	PDGFRB, RET, ERBB3, ERBB2, FGFR3, JAK3	40	115	16881	22.0187	0.00109953	0.000275032	0.000260556
GOTERM_MF_DIRECT	GO:0004714~transmembrane receptor protein tyrosine kinase activity	4	10	9.09407e-05	RET, ERBB3, FLT4, ERBB2	40	38	16881	44.4237	0.0154313	0.00311017	0.00294648
GOTERM_MF_DIRECT	GO:0046934~phosphatidylinositol-4,5-bisphosphate 3-kinase activity	4	10	0.000392377	PDGFRB, ERBB3, ERBB2, FGFR3	40	62	16881	27.2274	0.0649073	0.0100234	0.00949587
GOTERM_MF_DIRECT	GO:0019903~protein phosphatase binding	4	10	0.000411339	FLT4, ERBB2, TP53, JAK3	40	63	16881	26.7952	0.0679357	0.0100234	0.00949587
GOTERM_MF_DIRECT	GO:0008134~transcription factor binding	6	15	0.000468932	RB1, KAT6B, PRKDC, IRF4, TP53, PBX1	40	284	16881	8.91602	0.0770739	0.0100234	0.00949587
GOTERM_MF_DIRECT	GO:0019899~enzyme binding	6	15	0.0009622	BCR, PDGFRB, NOTCH1, PRKDC, POLD1, TP53	40	333	16881	7.60405	0.15178	0.0182818	0.0173196
GOTERM_MF_DIRECT	GO:0004672~protein kinase activity	6	15	0.00134433	RET, ERBB3, PRKDC, ERBB2, ERCC2, ABL2	40	359	16881	7.05334	0.205494	0.022988	0.0217781
GOTERM_MF_DIRECT	GO:0019838~growth factor binding	3	7.5	0.00176008	ERBB3, FLT4, ERBB2	40	27	16881	46.8917	0.260099	0.0273613	0.0259212
GOTERM_MF_DIRECT	GO:0042803~protein homodimerization activity	5	12.5	0.0866029	ERBB3, IDH1, ERCC5, BMPR1A, SYNE1	40	730	16881	2.89058	1	0.506501	0.479843
GOTERM_MF_DIRECT	GO:0042802~identical protein binding	5	12.5	0.0930923	RB1, CASP8, ERBB3, ERBB2, TP53	40	749	16881	2.81726	1	0.506501	0.479843
GOTERM_MF_DIRECT	GO:0005102~receptor binding	5	12.5	0.00868547	PDGFRB, LAMA2, IDH1, ABL2, JAK3	40	353	16881	5.97769	0.775011	0.123768	0.117254
GOTERM_MF_DIRECT	GO:0003690~double-stranded DNA binding	3	7.5	0.0150218	PRKDC, ERCC5, TP53	40	81	16881	15.6306	0.924846	0.196201	0.185874
GOTERM_MF_DIRECT	GO:0000405~bubble DNA binding	2	5	0.0160632	RECQL4, ERCC5	40	7	16881	120.579	0.937282	0.196201	0.185874
GOTERM_MF_DIRECT	GO:0016301~kinase activity	4	10	0.0179963	BCR, RET, PRKDC, ERBB2	40	241	16881	7.00456	0.955193	0.205158	0.19436
GOTERM_MF_DIRECT	GO:0019901~protein kinase binding	4	10	0.055559	PDGFRB, CYLD, APC, TP53	40	376	16881	4.48963	0.999943	0.413069	0.391329
GOTERM_MF_DIRECT	GO:0003682~chromatin binding	4	10	0.061053	DNMT1, POLD1, TP53, FOXP1	40	391	16881	4.31739	0.999979	0.417602	0.395623
GOTERM_MF_DIRECT	GO:0047485~protein N-terminus binding	3	7.5	0.0210937	ERCC2, ERCC5, TP53	40	97	16881	13.0523	0.973895	0.205832	0.194999
GOTERM_MF_DIRECT	GO:0046982~protein heterodimerization activity	5	12.5	0.0218496	NOTCH1, ERBB3, ERBB2, TP53, PBX1	40	465	16881	4.5379	0.977125	0.205832	0.194999
GOTERM_MF_DIRECT	GO:0003700~transcription factor activity, sequence-specific DNA binding	7	17.5	0.0218579	RB1, NOTCH1, IRF4, CBL, TP53, PBX1, FOXP1	40	961	16881	3.07406	0.977158	0.205832	0.194999
GOTERM_MF_DIRECT	GO:0000981~RNA polymerase II transcription factor activity, sequence-specific DNA binding	3	7.5	0.0592174	TP53, BMPR1A, FOXP1	40	171	16881	7.40395	0.999971	0.417602	0.395623
GOTERM_MF_DIRECT	GO:0004888~transmembrane signaling receptor activity	3	7.5	0.0873472	ERBB3, ERBB2, TLR4	40	214	16881	5.91624	1	0.506501	0.479843
GOTERM_MF_DIRECT	GO:0004872~receptor activity	3	7.5	0.0894384	RET, NOTCH1, TLR4	40	217	16881	5.83445	1	0.506501	0.479843
GOTERM_MF_DIRECT	GO:0004716~receptor signaling protein tyrosine kinase activity	2	5	0.0228702	ERBB3, ERBB2	40	10	16881	84.405	0.980865	0.205832	0.194999
GOTERM_MF_DIRECT	GO:0045295~gamma-catenin binding	2	5	0.0273827	APC, CDH1	40	12	16881	70.3375	0.991329	0.234122	0.2218
GOTERM_MF_DIRECT	GO:0043565~sequence-specific DNA binding	5	12.5	0.0308931	NOTCH1, IRF4, TP53, PBX1, FOXP1	40	518	16881	4.0736	0.995327	0.251558	0.238318
GOTERM_MF_DIRECT	GO:0004520~endodeoxyribonuclease activity	2	5	0.0496423	ERCC5, BIVM-ERCC5	40	22	16881	38.3659	0.999835	0.385856	0.365548
GOTERM_CC_DIRECT	GO:0005634~nucleus	24	60	0.000136468	RB1, PDGFRB, NUP214, DNMT1, NOTCH1, FLT4, FANCA, CBL, BIVM-ERCC5, PBX1, FOXP1, SYNE1, RECQL4, APC, FANCD2, KAT6B, IRF4, POLD1, ERBB2, ERCC2, TRIP11, ERCC5, FGFR3, TP53	40	5415	18224	2.01928	0.0181218	0.00684137	0.00627976
GOTERM_CC_DIRECT	GO:0005737~cytoplasm	19	47.5	0.0150356	PDGFRB, RET, FLT4, IDH1, FANCA, CBL, PBX1, SYNE1, RECQL4, CASP8, APC, FANCD2, CDH1, IRF4, POLD1, ERBB2, ERCC2, TP53, TLR4	40	5222	18224	1.65768	0.868674	0.251847	0.231173
GOTERM_CC_DIRECT	GO:0005654~nucleoplasm	18	45	2.22175e-05	RB1, NUP214, DNMT1, NOTCH1, PRKDC, FANCA, PBX1, FOXP1, SYNE1, CASP8, APC, FANCD2, KAT6B, IRF4, POLD1, ERCC2, ERCC5, TP53	40	2784	18224	2.94569	0.00297274	0.00297714	0.00273275
GOTERM_CC_DIRECT	GO:0005829~cytosol	15	37.5	0.00663149	NUP214, NOTCH1, PRKDC, DOCK8, IDH1, CBL, BCR, CYLD, CASP8, APC, IRF4, ABL2, SH2B3, JAK3, TP53	40	3315	18224	2.06154	0.589992	0.148103	0.135946
GOTERM_CC_DIRECT	GO:0016020~membrane	12	30	0.00517841	BCR, PDGFRB, RECQL4, RET, PRKDC, CDH1, IRF4, POLD1, DOCK8, ERBB2, ABCB11, JAK3	40	2200	18224	2.48509	0.501279	0.148103	0.135946
GOTERM_CC_DIRECT	GO:0043235~receptor complex	5	12.5	0.000153165	RET, NOTCH1, ERBB3, FLT4, ERBB2	40	127	18224	17.937	0.0203165	0.00684137	0.00627976
GOTERM_CC_DIRECT	GO:0048471~perinuclear region of cytoplasm	5	12.5	0.0428543	CYLD, CDH1, ERBB2, CBL, TLR4	40	621	18224	3.66828	0.997175	0.351535	0.322678
GOTERM_CC_DIRECT	GO:0016324~apical plasma membrane	4	10	0.0241184	PDGFRB, NOTCH1, ERBB3, ERBB2	40	291	18224	6.26254	0.962049	0.269322	0.247213
GOTERM_CC_DIRECT	GO:0005913~cell-cell adherens junction	4	10	0.0315143	APC, CDH1, IDH1, CBL	40	323	18224	5.64211	0.986307	0.301637	0.276876
GOTERM_CC_DIRECT	GO:0005856~cytoskeleton	4	10	0.0445978	CASP8, TRIP11, JAK3, SYNE1	40	371	18224	4.91213	0.997787	0.351535	0.322678
GOTERM_CC_DIRECT	GO:0005925~focal adhesion	4	10	0.0507385	NUP214, PDGFRB, CDH1, FGFR3	40	391	18224	4.66087	0.999067	0.37772	0.346713
GOTERM_CC_DIRECT	GO:0016328~lateral plasma membrane	3	7.5	0.00574022	ERBB3, APC, CDH1	40	53	18224	25.7887	0.537637	0.148103	0.135946
GOTERM_CC_DIRECT	GO:0031234~extrinsic component of cytoplasmic side of plasma membrane	3	7.5	0.00929983	CYLD, ABL2, JAK3	40	68	18224	20.1	0.71407	0.178025	0.163411
GOTERM_CC_DIRECT	GO:0005819~spindle	3	7.5	0.0276094	RB1, CYLD, ERCC2	40	121	18224	11.2959	0.976522	0.284589	0.261227
GOTERM_CC_DIRECT	GO:0010008~endosome membrane	3	7.5	0.0594551	RET, ERBB2, TLR4	40	185	18224	7.38811	0.999729	0.398349	0.365649
GOTERM_CC_DIRECT	GO:0045121~membrane raft	3	7.5	0.0717447	RET, CASP8, CBL	40	206	18224	6.63495	0.999954	0.43284	0.397309
GOTERM_CC_DIRECT	GO:0016600~flotillin complex	2	5	0.0191004	CDH1, CBL	40	9	18224	101.244	0.924545	0.255946	0.234935
GOTERM_CC_DIRECT	GO:0016342~catenin complex	2	5	0.0191004	APC, CDH1	40	9	18224	101.244	0.924545	0.255946	0.234935
GOTERM_CC_DIRECT	GO:0005675~holo TFIIH complex	2	5	0.0232964	ERCC2, ERCC5	40	11	18224	82.8364	0.957517	0.269322	0.247213
GOTERM_CC_DIRECT	GO:0005657~replication fork	2	5	0.0357798	DNMT1, TP53	40	17	18224	53.6	0.992421	0.319633	0.293394
