# Supplementary material for: The potential, analysis and prospect of ctDNA sequencing in hepatocellular carcinoma
Source: PeerJ. 2022 May 17;10:e13473. doi: 10.7717/peerj.13473 (PMC9121877; doi:10.7717/peerj.13473)
Supplement: Supplemental Information 8 [file peerj-10-13473-s008.xlsx]

## Sheet: Original document
	All in one cancer panel sequencing and analysis technical service (entrustment) contract for 100 samples of Mingshi gene
	1、 Contract information
	Contract No.:	H101SC20011094
	Contract Name:	All in one cancer panel sequencing and analysis technical service (entrustment) contract for 100 samples of Mingshi gene
	Operation mailbox:	liuxiaochuan@novogene.com
	SOP Code:	SOPRE00012（Personalized analysis - tumor evolutionary tree analysis）
	2、 Analysis link information
	Warm tips: Please fill in and check the contents of this form carefully to avoid accidental losses due to missing information or errors; After completing this form correctly and giving feedback, start to build the database and calculate the project cycle. The incomplete or wrong communication time in this form will be deducted from the project cycle.
	Filling instructions:
	1. The contents marked with asterisk (* *) are mandatory;
	2. Original name and number of sample: please keep consistent with the name of sample information sheet or quality inspection report;
	3. Sample type: paracancerous tissue, cancer tissue, blood, saliva, cell line, FFPE, FFPE amplification product, single cell amplification product, CF / ctDNA, PCR product;
	4. If there are special requirements, please explain them in the remarks as concise and concise as possible. The contents filled in only include the analysis of contract signing, not personalized analysis requirements;
	Sample Nohe No**	Tumor diagnosis time**	Original naming of samples**	Acquisition time**	Sample type**	Sequencing strategy (WGS / Wes / target)**	AFP(ug/L)	Gender**	Cancer species name (provided to subtype)**	Sample nature (primary / metastatic / recurrent)	hepatitis	clinical stages	Age**(year)
	LRM43697	2019.08.20	LRM	2019.08.21	blood	Target	480600	male	Primary liver cancer	Primary	HBV	T3bN1M1	33
	LXH42278	2015.10.01	LXH	2019.10.26	blood	Target	407.9	male	Primary liver cancer	Primary	HBV	T2N0M0	61
	LBS43614	2019.05.29	LBS	2019.5.29	blood	Target	116.1	male	Gallbladder carcinoma complicated with liver metastasis	transfer	NO	T2N1M1	64
	ZFY43571	2019.04.16	ZFY	2019.4.20	blood	Target	480300	male	Primary liver cancer	Primary	HBV and HCV	T3bN1M1	49
	TCX43701	2019.08.24	TCX	2019.8.25	blood	Target	71.6	female	Primary liver cancer	Primary	NO	T3bN1M0	49
	THP43630	2019.06.14	THP	2019.6.22	blood	Target	0.3	male	Primary liver cancer	Primary	HBV	T3aN1M0	50
	HSW43650	2019.07.04	HSW	2019.7.14	blood	Target	0.6	male	Rectal cancer complicated with liver metastasis	transfer	NO	T2N0M0	55
	LZC43807	2019.12.08	LZC	2019.12.15	blood	Target	143000	male	Primary liver cancer	Primary	HBV	T3bN0M1	60
	DEY43531	2019.03.07	DEY	2019.11.03	blood	Target	207.9	female	Primary liver cancer	Primary	HCV	T3aN1M1	68
	CZL43191	2018.04.01	CZL	2019.4.3	blood	Target	8.4	male	Primary liver cancer	Primary	NO	T3aN0M0	62
